# Supplementary material
Source: publisher figshare collection journal article supplement (https://wiley.figshare.com/ndownloader/files/12417092)
Supplement: Supplementary file 1 [file 12417092]

## Sheet: Temporal (retro)
Injection site	DV	AP	ML
f	-0.015	-3.6	0.970429		a	PL
f	-0.0629487	-3.6	0.990344		b	PL
f	-0.0809712	-3.6	0.969207		c	IL/MO
f	-0.115677	-3.6	1.0206		d	VO/VLO
f	-0.158469	-3.6	1.07269		e	VLO/LO
f	-0.196596	-3.6	1.04253		f	LO/DLO
f	-0.206836	-3.6	0.963331		g	DLO
f	-0.17892	-3.6	0.935855
f	-0.139329	-3.6	0.815015
f	-0.214971	-3.6	0.730017
f	-0.27619	-3.6	0.767536
f	-0.367032	-3.6	0.920054
f	-0.151328	-3.6	0.922585
f	-0.103591	-3.6	0.846787
f	-0.151328	-3.6	0.740017
f	-0.108541	-3.6	0.943696
f	-0.0753738	-3.6	1.00503
f	-0.295941	-3.6	0.910116
f	-0.330246	-3.6	0.970264
f	-0.116324	-3.6	0.991526
f	0.0456212	-3.6	0.97873
f	0.05025	-3.6	0.990029
f	0.0269263	-3.6	0.964786
f	0.211792	-3.6	0.534421
f	0.350089	-3.6	1.07533
f	0.364982	-3.6	1.11742
f	0.409794	-3.6	1.22985
f	0.715681	-3.6	1.19387
f	0.857504	-3.6	0.253833
f	0.887335	-3.6	0.614594
f	0.90965	-3.6	0.970696
f	-0.015	-3.6	0.600334
f	-0.0127475	-3.6	0.57
f	-0.0225	-3.6	0.625045
f	-0.04	-3.6	0.71
f	-0.0325963	-3.6	0.892514
f	-0.0725	-3.6	0.885004
f	-0.0975325	-3.6	0.855
f	-0.137705	-3.6	0.837534
f	-0.165076	-3.6	0.64176
f	-0.220511	-3.6	0.634886
f	-0.242706	-3.6	0.576764
f	-0.455171	-3.6	0.573726
f	-0.490516	-3.6	0.783363
f	-0.578279	-3.6	0.789185
f	-0.355712	-3.6	0.958831
f	-0.132524	-3.6	0.810529
f	-0.142587	-3.6	0.950841
f	-0.135093	-3.6	0.537506
f	-0.120026	-3.6	0.685005
f	-0.09	-3.6	0.680019
f	-0.065	-3.6	0.670168
f	-0.085	-3.6	0.693294
f	-0.127525	-3.6	0.727479
f	-0.13	-3.6	0.742706
f	-0.1525	-3.6	0.855574
f	-0.05256	-3.6	0.805249
f	-0.16517	-3.6	0.782564
f	-0.28	-3.6	0.752566
f	-0.2826	-3.6	0.662505
f	-0.320244	-3.6	0.803056
f	-0.192565	-3.6	0.846787
f	-0.230123	-3.6	0.901679
f	-0.242551	-3.6	0.940014
f	-0.302871	-3.6	0.9744
f	-0.380205	-3.6	0.875089
f	-0.380205	-3.6	0.841966
f	-0.42536	-3.6	0.802846
f	-0.485644	-3.6	0.892766
f	-0.182518	-3.6	0.350615
f	-0.127597	-3.6	0.308424
f	0.04507	-3.6	0.531836
f	0.015	-3.6	0.633921
f	0.0125	-3.6	0.683127
f	0.0325	-3.6	0.74282
f	0.07	-3.6	0.716
f	0.07	-3.6	0.88954
f	0.0875	-3.6	0.860396
f	0.0725	-3.6	0.940433
f	0.095	-3.6	0.959964
f	0.0951312	-3.6	1.17233
f	0.0826512	-3.6	1.1195
f	0.125	-3.6	1.20612
f	0.122525	-3.6	1.23722
f	0.1525	-3.6	1.23293
f	0.1275	-3.6	0.980105
f	0.152684	-3.6	0.946457
f	0.187516	-3.6	0.815299
f	0.287511	-3.6	0.848179
f	0.380131	-3.6	0.841435
f	0.412772	-3.6	0.759872
f	0.4125	-3.6	0.777516
f	0.585261	-3.6	0.79537
f	0.63252	-3.6	0.740511
f	0.69504	-3.6	0.775145
f	0.715	-3.6	0.680005
f	0.725004	-3.6	0.935404
f	0.667618	-3.6	0.724094
f	-0.09	-3.8	0.603086
f	-0.0800388	-3.8	0.616654
f	-0.03	-3.8	0.472394
f	-0.025125	-3.8	0.580742
f	-0.0575	-3.8	0.646471
f	-0.085	-3.8	0.556024
f	-0.12	-3.8	0.612745
f	-0.162578	-3.8	0.635064
f	-0.165076	-3.8	0.722504
f	-0.2375	-3.8	0.717714
f	-0.117526	-3.8	0.712969
f	-0.15252	-3.8	0.71583
f	-0.15	-3.8	0.723796
f	-0.232715	-3.8	0.711846
f	-0.255306	-3.8	0.820404
f	-0.402624	-3.8	0.951479
f	-0.192516	-3.8	0.937636
f	-0.292542	-3.8	0.78985
f	-0.240117	-3.8	0.801503
f	-0.297878	-3.8	0.778529
f	-0.267546	-3.8	0.869088
f	0.03	-3.8	0.840064
f	0.025	-3.8	0.760148
f	0.05256	-3.8	0.582602
f	0.1425	-3.8	0.432391
f	0.272546	-3.8	0.617455
f	0.1025	-3.8	0.6465
f	0.1125	-3.8	0.741304
f	0.100031	-3.8	0.785481
f	0.187566	-3.8	0.887965
f	0.265106	-3.8	0.723469
f	0.1275	-3.8	0.787162
f	-0.165925	-4.16	0.488723
f	-0.244669	-4.16	0.547546
f	-0.257063	-4.16	0.596809
f	-0.335876	-4.16	0.557281
f	-0.264823	-4.16	0.593001
f	-0.295222	-4.16	0.600375
f	-0.337019	-4.16	0.619839
f	-0.356931	-4.16	0.797724
f	-0.40697	-4.16	0.817653
f	-0.464441	-4.16	0.639345
f	-0.49856	-4.16	0.685356
f	-0.479225	-4.16	0.700875
f	-0.445604	-4.16	0.722669
f	-0.484053	-4.16	0.730244
f	0.0604675	-4.16	0.680266
f	0.076035	-4.16	0.682793
f	0.0908637	-4.16	0.748215
f	0.265165	-4.16	0.725844
f	0.519501	-4.16	0.702318
f	0.43538	-4.16	0.766277
f	0.445344	-4.16	0.167107
f	0.489572	-4.16	0.183115
f	-0.0075	-4.52	0.608815
f	-0.16568	-4.52	0.568518
f	-0.30104	-4.52	0.55177
f	-0.376007	-4.52	0.366819
f	-0.586925	-4.52	0.454161
f	-0.654609	-4.52	0.540231
f	-0.411946	-4.52	0.448533
f	-0.343811	-4.52	0.536919
f	-0.361247	-4.52	0.545969
f	-0.423749	-4.52	0.657519
f	-0.406302	-4.52	0.888995
f	-0.378896	-4.52	0.676041
f	-0.588329	-4.52	0.653055
f	-0.628907	-4.52	0.562695
f	-0.736155	-4.52	0.521967
f	-0.398826	-4.52	0.589475
f	0.0555087	-4.52	0.64454
f	0.0527375	-4.52	0.249311
f	0.163726	-4.52	0.698794
f	-0.155181	-4.8	0.571357
f	-0.2	-4.8	0.506951
f	-0.2175	-4.8	0.595803
f	-0.265047	-4.8	0.588218
f	-0.23	-4.8	0.654599
f	-0.250012	-4.8	0.62734
f	-0.272546	-4.8	0.616542
f	-0.29501	-4.8	0.769619
f	-0.315357	-4.8	0.7925
f	-0.345036	-4.8	0.830365
f	-0.295095	-4.8	0.775777
f	-0.3625	-4.8	0.959807
f	-0.277545	-4.8	0.357771
f	-0.390007	-4.8	0.503612
f	-0.35258	-4.8	0.643681
f	-0.3475	-4.8	0.615046
f	-0.600084	-4.8	0.636445
f	-0.285099	-4.8	0.492545
f	-0.305092	-4.8	0.577997
f	-0.395031	-4.8	0.56805
f	-0.2925	-4.8	0.798409
f	0.06	-4.8	0.584572
f	0.247512	-4.8	0.642772
g	-0.10152	-4.8	0.672727
g	-0.15348	-4.8	0.700071
g	-0.271685	-4.8	0.504876
g	-0.286061	-4.8	0.743576
g	-0.314006	-4.8	0.813745
g	-0.45646	-4.8	0.828044
g	-0.479649	-4.8	0.555434
g	-0.514987	-4.8	0.453335
g	-0.510942	-4.8	0.488755
g	-0.745294	-4.8	0.551231
g	-0.414344	-4.8	0.420476
g	-0.339899	-4.8	0.494121
g	-0.453659	-4.8	0.580329
g	-0.450472	-4.8	0.611479
g	-0.27542	-4.8	0.631808
g	-0.43135	-4.8	0.690927
g	-0.377128	-4.8	0.743539
g	-0.394589	-4.8	0.788393
g	-0.505229	-4.8	0.784896
g	0.187416	-4.8	0.814958
g	0.24219	-4.8	0.819028
g	0.153806	-4.8	0.413114
g	0.179252	-4.8	0.559464
g	0.246539	-4.8	0.392046
g	0.273645	-4.8	0.213571
g	0.2943	-4.8	0.247904
g	0.462986	-4.8	0.264126
g	0.462986	-4.8	0.364435
g	0.540306	-4.8	0.517065
g	0.736079	-4.8	0.606671
g	0.377509	-4.8	0.8022
g	0.247487	-4.8	0.909574
g	0.428026	-4.8	1.01771
g	0.437843	-4.8	0.620288
g	0.47101	-4.8	0.771658
g	0.342345	-4.8	0.681658
g	0.16869	-4.8	0.812823
g	0.100281	-4.8	0.554487
g	-0.114727	-4.8	0.685
g	-0.15742	-4.8	0.702785
g	-0.295645	-4.8	0.519242
g	-0.320664	-4.8	0.758309
g	-0.313249	-4.8	0.736534
g	-0.26269	-4.8	0.786329
g	-0.374065	-4.8	0.832946
g	-0.432796	-4.8	0.562773
g	-0.481572	-4.8	0.44622
g	-0.313617	-4.8	0.486339
g	-0.358442	-4.8	0.599678
g	-0.472261	-4.8	0.71395
g	-0.537174	-4.8	0.74282
g	-0.644035	-4.8	0.75898
g	-0.742836	-4.8	0.788071
g	-0.434467	-4.8	0.824912
g	-0.446774	-4.8	0.785175
g	-0.522212	-4.8	0.827016
g	-0.611295	-4.8	0.849519
g	-0.622986	-4.8	0.793745
g	-0.600692	-4.8	0.572216
g	0.0425738	-4.8	0.601711
g	0.173961	-4.8	0.629051
g	0.165719	-4.8	0.718862
g	0.227005	-4.8	0.775262
g	0.176015	-4.8	0.427968
g	0.260984	-4.8	0.493412
g	0.305941	-4.8	0.630124
g	0.467259	-4.8	0.56827
g	0.510913	-4.8	0.223005
g	0.697209	-4.8	0.182654
g	0.192256	-4.8	0.224235
g	0.221614	-4.8	0.262488
g	0.244655	-4.8	0.311137
g	0.349759	-4.8	0.351924
g	0.194052	-4.8	0.460123
g	0.447667	-4.8	0.615081
g	0.444213	-4.8	0.499663
g	0.485135	-4.8	0.814314
g	0.454216	-4.8	0.74046
g	0.329489	-4.8	0.923326
g	-0.1025	-4.8	0.452839
g	-0.331436	-4.8	0.503252
g	-0.350089	-4.8	0.682541
g	-0.532241	-4.8	0.713622
g	-0.497751	-4.8	0.667729
g	-0.463209	-4.8	0.755501
g	-0.410586	-4.8	0.744181
g	-0.296331	-4.8	0.448693
g	-0.15052	-4.8	0.503569
g	-0.292714	-4.8	0.54766
g	-0.31238	-4.8	0.543972
g	-0.0579875	-4.8	0.600375
g	-0.076485	-4.8	0.786329
g	-0.10198	-4.8	0.817435
g	-0.26231	-4.8	0.861256
g	-0.316741	-4.8	0.793225
g	-0.370177	-4.8	0.809695
g	-0.383935	-4.8	0.85309
g	-0.474111	-4.8	0.773644
g	-0.444754	-4.8	0.808846
g	-0.448616	-4.8	0.698324
g	-0.45156	-4.8	0.744585
g	-0.427551	-4.8	0.775536
g	-0.512848	-4.8	0.813069
g	-0.549915	-4.8	0.840405
g	-0.610742	-4.8	0.827969
g	-0.594732	-4.8	0.568737
g	-0.613398	-4.8	0.544501
g	-0.627081	-4.8	0.60455
g	-0.732005	-4.8	0.590307
g	-0.810131	-4.8	0.642281
g	-0.446164	-4.8	0.764076
g	-0.130433	-4.8	0.792421
g	-0.255979	-4.8	0.678366
g	-0.0134625	-4.8	0.420186
g	-0.146735	-4.8	0.503004
g	-0.143179	-4.8	0.647674
g	-0.0419075	-4.8	0.686409
g	-0.0237175	-4.8	0.54
g	-0.165719	-4.8	0.413824
g	0.240117	-4.8	0.586941
g	0.271707	-4.8	0.60063
g	0.305461	-4.8	0.576091
g	0.190739	-4.8	0.46734
g	0.31283	-4.8	0.188977
g	0.210861	-4.8	0.234441
g	0.21532	-4.8	0.263356
g	0.449924	-4.8	0.30501
g	0.376539	-4.8	0.345009
g	0.454161	-4.8	0.442831
g	0.0838525	-4.8	0.388305
g	0.0406975	-4.8	0.599416
g	0.0292612	-4.8	0.50718
g	0.0325	-4.8	0.790795
g	0.514326	-4.8	0.883986
g	0.702113	-4.8	1.00477
g	0.354771	-4.8	0.705195
g	0.37108	-4.8	0.65622
g	0.480845	-4.8	0.540856
g	0.514399	-4.8	0.425184
g	0.460977	-4.8	0.687009
g	-0.0525	-4.52	0.120675
g	-0.085	-4.52	0.170385
g	-0.0025	-4.52	0.322229
g	-0.1125	-4.52	0.436034
g	-0.227555	-4.52	0.461552
g	-0.0525	-4.52	0.514787
g	-0.33001	-4.52	0.52892
g	-0.490006	-4.52	0.56005
g	-0.535	-4.52	0.598252
g	-0.465	-4.52	0.377707
g	-0.430065	-4.52	0.432897
g	-0.495006	-4.52	0.51823
g	-0.455061	-4.52	0.530671
g	-0.4825	-4.52	0.541029
g	-0.24	-4.52	0.674449
g	-0.540006	-4.52	0.713337
g	-0.535006	-4.52	0.783343
g	-0.542522	-4.52	0.920224
g	-0.105	-4.52	1.01119
g	-0.1225	-4.52	1.06237
g	-0.1075	-4.52	1.00625
g	-0.322655	-4.52	1.06356
g	-0.5275	-4.52	1.06095
g	-0.562522	-4.52	0.857818
g	-0.5175	-4.52	0.6425
g	-0.505056	-4.52	0.722097
g	-0.55755	-4.52	1.04505
g	-0.52	-4.52	0.826139
g	-0.405031	-4.52	0.793095
g	-0.162578	-4.52	0.67862
g	0.0226387	-4.52	0.779106
g	0.06	-4.52	0.0831038
g	0.0775	-4.52	0.852005
g	0.0675	-4.52	1.18521
g	0.01	-4.52	0.663631
g	0.170019	-4.52	0.676687
g	0.217514	-4.52	0.517506
g	0.23512	-4.52	0.32423
g	0.162519	-4.52	0.268386
g	0.265106	-4.52	0.248395
g	0.285099	-4.52	0.0604675
g	0.412772	-4.52	0.035
g	0.455006	-4.52	0.0752075
g	0.475165	-4.52	0.195256
g	0.475105	-4.52	0.233077
g	0.465168	-4.52	0.346879
g	0.973222	-4.52	0.349946
g	1.04793	-4.52	0.377036
g	0.787821	-4.52	0.555816
g	0.772516	-4.52	0.538446
g	0.768086	-4.52	0.569352
g	0.95003	-4.52	0.590874
g	1.04255	-4.52	0.706116
g	0.562522	-4.52	0.756257
a	-0.105386	-3.3	0.320087
a	0.0693275	-3.3	0.379251
a	0.292959	-3.3	0.367509
a	0.522805	-3.3	0.190016
a	0.623067	-3.3	0.2136
a	0.778235	-3.3	0.627694
a	0.874989	-3.3	0.564646
a	0.881266	-3.3	0.705766
a	0.93523	-3.3	0.841891
a	1.12081	-3.3	0.821131
a	-0.0878213	-3.3	0.500006
a	-0.0980113	-3.3	0.658431
a	-0.246272	-3.3	0.714186
a	-0.253291	-3.3	0.702785
a	-0.412196	-3.3	1.01793
a	-0.347311	-3.3	0.844668
a	-0.326879	-3.3	0.938616
a	-0.494785	-3.3	0.931719
a	-0.0878213	-3.3	0.681038
a	-0.157995	-3.3	0.865032
a	0.0961775	-3.3	0.189736
a	0.429215	-3.3	0.326582
a	0.790004	-3.3	0.322694
a	1.01653	-3.3	0.476294
a	1.14932	-3.3	0.528234
a	0.995552	-3.3	0.576221
a	1.14914	-3.3	0.63056
a	0.885472	-3.3	0.619809
a	0.939814	-3.3	0.400913
a	1.10577	-3.3	0.363326
a	0.627874	-3.3	0.843568
a	0.526925	-3.3	0.928392
a	0.42823	-3.3	1.09654
a	0.488582	-3.3	1.15349
a	0.585433	-3.3	1.18832
a	0.645698	-3.3	1.23516
a	0.631433	-3.3	1.19851
a	0.665676	-3.3	1.19202
a	0.726245	-3.3	1.04395
a	1.04502	-3.3	1.07081
a	1.0949	-3.3	0.993004
a	1.06933	-3.3	1.10856
a	0.91447	-3.3	0.933786
a	1.12484	-3.3	1.06738
a	0.220482	-3.4	0.509933
a	0.298685	-3.4	0.59926
a	0.342207	-3.4	0.474032
a	0.2864	-3.4	0.726761
a	0.349464	-3.4	0.748206
a	0.370961	-3.4	0.895869
a	0.566976	-3.4	0.900711
a	0.444979	-3.4	0.986845
a	0.61002	-3.4	1.03673
a	0.576161	-3.4	1.07203
a	0.625205	-3.4	1.10874
a	0.633127	-3.4	1.13447
a	0.571369	-3.4	1.15752
a	0.720139	-3.4	1.23329
a	0.932536	-3.4	0.627952
c	-0.25894	-2.8	0.0959121
c	-0.167705	-2.8	0.129522
c	-0.0375	-2.8	0.139205
c	-0.20744	-2.8	0.152477
c	-0.344184	-2.8	0.15546
c	-0.467774	-2.8	0.159171
c	-0.431169	-2.8	0.148022
c	-0.362801	-2.8	0.132816
c	-0.494431	-2.8	0.13546
c	-0.560496	-2.8	0.100559
c	-0.626598	-2.8	0.148275
c	-0.738589	-2.8	0.162064
c	-0.63697	-2.8	0.176728
c	-0.784207	-2.8	0.180499
c	-1.04139	-2.8	0.165965
c	-1.03255	-2.8	0.161276
c	-1.2532	-2.8	0.158465
c	-1.40762	-2.8	0.138914
c	-0.698789	-2.8	0.0656068
c	-0.460441	-2.8	0.195365
c	-0.0309237	-2.8	0.159551
c	-0.0838525	-2.8	0.184826
c	-0.105267	-2.8	0.189768
c	-0.47363	-2.8	0.203913
c	-0.484026	-2.8	0.203586
c	-0.567825	-2.8	0.210835
c	-0.20471	-2.8	0.208335
c	-0.0604675	-2.8	0.221078
c	-0.238354	-2.8	0.225938
c	-0.166527	-2.8	0.234922
c	-0.245675	-2.8	0.245058
c	-0.345732	-2.8	0.257411
c	-0.320664	-2.8	0.288587
c	-0.685584	-2.8	0.312341
c	-0.792626	-2.8	0.227863
c	-0.679567	-2.8	0.243888
c	-0.919814	-2.8	0.243308
c	-0.701681	-2.8	0.259916
c	-0.829826	-2.8	0.265464
c	-1.00366	-2.8	0.267329
c	-1.22197	-2.8	0.257683
c	-0.841339	-2.8	0.264865
c	-0.510496	-2.8	0.280867
c	-0.694308	-2.8	0.274719
c	-0.75015	-2.8	0.282614
c	-0.411886	-2.8	0.282885
c	-0.610456	-2.8	0.288274
c	-0.528045	-2.8	0.285808
c	-0.464879	-2.8	0.289672
c	-0.373648	-2.8	0.289156
c	-0.463606	-2.8	0.296913
c	-0.495737	-2.8	0.307383
c	-0.554847	-2.8	0.304955
c	-0.646089	-2.8	0.301653
c	-0.834794	-2.8	0.304853
c	-0.738589	-2.8	0.292662
c	-0.904644	-2.8	0.306049
c	-0.985359	-2.8	0.312094
c	-1.084	-2.8	0.306669
c	-1.17752	-2.8	0.318793
c	-1.63562	-2.8	0.328149
c	-1.9967	-2.8	0.316839
c	-2.37058	-2.8	0.31134
c	-2.475	-2.8	0.306949
c	-2.24375	-2.8	0.300854
c	-2.31078	-2.8	0.289783
c	-2.01358	-2.8	0.295204
c	0.262607	-2.8	0.0522906
c	0.12947	-2.8	0.146682
c	0.192825	-2.8	0.235559
c	0.226991	-2.8	0.254834
c	0.33415	-2.8	0.234827
c	0.232862	-2.8	0.224571
c	0.410586	-2.8	0.216106
c	0.371231	-2.8	0.205549
c	0.483735	-2.8	0.264802
c	0.754524	-2.8	0.257171
c	0.633606	-2.8	0.206332
c	0.954889	-2.8	0.257729
c	0.916106	-2.8	0.211953
c	0.751349	-2.8	0.177585
c	0.99479	-2.8	0.22413
c	0.934345	-2.8	0.206546
c	1.14796	-2.8	0.228128
c	1.37774	-2.8	0.241302
c	1.58364	-2.8	0.233785
c	1.8765	-2.8	0.22974
c	1.86054	-2.8	0.248902
c	1.62501	-2.8	0.257079
c	1.56259	-2.8	0.26874
c	1.63249	-2.8	0.275078
c	1.73516	-2.8	0.278695
c	1.92329	-2.8	0.255159
c	1.97491	-2.8	0.249886
c	1.96795	-2.8	0.276759
c	2.03746	-2.8	0.274247
c	2.13012	-2.8	0.308341
c	2.01676	-2.8	0.330872
c	-0.232984	-2.8	0.105548
c	-0.316425	-2.8	0.149453
c	-0.385138	-2.8	0.15402
c	-0.320664	-2.8	0.154249
c	-0.805334	-2.8	0.14278
c	-1.30051	-2.8	0.137988
c	-0.753031	-2.8	0.226501
c	-0.450562	-2.8	0.24411
c	-0.638602	-2.8	0.252777
c	-0.775444	-2.8	0.269776
c	0.40507	-2.8	0.198148
c	0.1275	-2.8	0.237428
c	0.480059	-2.8	0.249362
c	0.570049	-2.8	0.237253
c	1.05324	-2.8	0.281273
c	1.2902	-2.8	0.260176
c	1.67727	-2.8	0.243477
c	-0.09277	-2.8	0.221038
c	-0.231044	-2.8	0.100091
c	-0.225624	-2.8	0.114983
c	-0.447492	-2.8	0.111205
c	-0.606062	-2.8	0.0935547
c	-0.873614	-2.8	0.102366
c	-0.915123	-2.8	0.12033
c	-1.03255	-2.8	0.12268
c	-1.41679	-2.8	0.12431
c	-0.660554	-2.8	0.11593
c	-0.788393	-2.8	0.129739
c	-0.869613	-2.8	0.13452
c	-0.968052	-2.8	0.148827
c	-0.767679	-2.8	0.137143
c	-0.822269	-2.8	0.161753
c	-0.356546	-2.8	0.145247
c	-0.349294	-2.8	0.158959
c	-0.345732	-2.8	0.172614
c	-0.620327	-2.8	0.17258
c	-0.875704	-2.8	0.186872
c	-0.353456	-2.8	0.187182
c	-0.631516	-2.8	0.186774
c	-0.693131	-2.8	0.235768
c	-1.24982	-2.8	0.248703
c	-0.809514	-2.8	0.229511
c	-1.20248	-2.8	0.267788
c	-0.363807	-2.8	0.238977
c	-0.436806	-2.8	0.235171
c	-0.664501	-2.8	0.249705
c	-0.705837	-2.8	0.0705837
c	-2.44593	-2.8	0.0873614
c	-2.45323	-2.8	0.0865852
c	-2.54254	-2.8	0.0929819
c	-2.60289	-2.8	0.0476707
c	-2.4635	-2.8	0.0651637
c	0.144849	-2.8	0.239221
c	0.102011	-2.8	0.207181
c	0.222991	-2.8	0.203019
c	0.230068	-2.8	0.232427
c	0.287456	-2.8	0.238883
c	0.353456	-2.8	0.213834
c	0.48193	-2.8	0.224462
c	0.600046	-2.8	0.214905
c	0.625745	-2.8	0.228695
c	0.642772	-2.8	0.241961
c	0.668972	-2.8	0.251639
c	1.146	-2.8	0.263498
c	1.02421	-2.8	0.284847
c	1.35781	-2.8	0.290778
c	1.2651	-2.8	0.301918
c	1.61433	-2.8	0.248088
c	1.7421	-2.8	0.245475
c	2.06277	-2.8	0.294165
c	1.62501	-2.8	0.175271
c	1.56095	-2.8	0.227733
c	2.003	-2.8	0.241574
c	0.860444	-2.8	0.228947
c	1.97	-2.8	0.30266
c	2.12287	-2.8	0.223758
c	2.23256	-2.8	0.22413
c	2.2098	-2.8	0.176478
c	1.50797	-2.8	0.174558
c	1.84841	-2.8	0.215767
c	2.06292	-2.8	0.264224
c	-0.241867	-3.14	0.0920425
c	-0.35757	-3.14	0.0975605
c	-0.520696	-3.14	0.100578
c	-0.558486	-3.14	0.0982815
c	-0.882645	-3.14	0.0502891
c	-0.550114	-3.14	0.12334
c	-0.675209	-3.14	0.130638
c	-0.809027	-3.14	0.128793
c	-0.959296	-3.14	0.114622
c	-1.10759	-3.14	0.0933441
c	-1.19974	-3.14	0.0884682
c	-0.2255	-3.14	0.126056
c	-0.324672	-3.14	0.131543
c	-0.419262	-3.14	0.14262
c	-0.540052	-3.14	0.147346
c	-0.723817	-3.14	0.146513
c	-0.815054	-3.14	0.137988
c	-0.0986475	-3.14	0.149874
c	-0.232984	-3.14	0.155975
c	-0.43169	-3.14	0.164298
c	-0.64735	-3.14	0.184351
c	-0.546266	-3.14	0.16798
c	-0.913678	-3.14	0.163995
c	-1.01936	-3.14	0.157309
c	-1.07658	-3.14	0.150423
c	-0.240469	-3.14	0.181162
c	-0.686609	-3.14	0.218506
c	-0.74049	-3.14	0.220945
c	-0.195144	-3.14	0.20773
c	-0.385138	-3.14	0.214542
c	-0.203746	-3.14	0.210054
c	-0.067915	-3.14	0.214521
c	-0.242913	-3.14	0.233164
c	-0.219559	-3.14	0.239832
c	-0.203746	-3.14	0.25576
c	-0.546266	-3.14	0.286521
c	-0.475408	-3.14	0.249583
c	-0.528417	-3.14	0.239824
c	-0.66952	-3.14	0.283198
c	-0.745976	-3.14	0.286521
c	-0.939747	-3.14	0.278293
c	-0.788071	-3.14	0.272491
c	-0.849621	-3.14	0.276476
c	-0.82626	-3.14	0.262334
c	-0.931934	-3.14	0.256672
c	0.879292	-3.14	0.249481
c	-1.0627	-3.14	0.237704
c	-1.28136	-3.14	0.233559
c	-1.31121	-3.14	0.307574
c	-1.49333	-3.14	0.294797
c	-1.65551	-3.14	0.286563
c	-1.71868	-3.14	0.280862
c	-1.91626	-3.14	0.281401
c	-2.11395	-3.14	0.285872
c	-1.58364	-3.14	0.296676
c	-2.37267	-3.14	0.275385
c	-2.60176	-3.14	0.254666
c	-2.73059	-3.14	0.241281
c	-1.92094	-3.14	0.299021
c	-2.04756	-3.14	0.299366
c	-2.21255	-3.14	0.291143
c	-2.35543	-3.14	0.288002
c	-2.47501	-3.14	0.286528
c	-2.58767	-3.14	0.275964
c	-2.67038	-3.14	0.2745
c	-2.88352	-3.14	0.262089
c	-2.6326	-3.14	0.295384
c	0.165	-3.14	0.141002
c	0.547551	-3.14	0.171634
c	0.675041	-3.14	0.150197
c	0.232984	-3.14	0.180025
c	0.218016	-3.14	0.208548
c	0.330766	-3.14	0.205019
c	0.458052	-3.14	0.213144
c	0.742841	-3.14	0.191804
c	0.819699	-3.14	0.189892
c	0.863315	-3.14	0.211521
c	0.316425	-3.14	0.227281
c	0.669561	-3.14	0.244059
c	0.744354	-3.14	0.21198
c	0.975721	-3.14	0.121558
c	2.78584	-3.14	0.228596
c	1.22581	-3.14	0.228322
c	1.56865	-3.14	0.216775
c	1.43691	-3.14	0.242004
c	1.63562	-3.14	0.258785
c	-0.935098	-3.14	0.160228
c	-1.28554	-3.14	0.17312
c	-1.05548	-3.14	0.141956
c	-1.21085	-3.14	0.14088
c	-1.69302	-3.14	0.146265
c	0.828571	-3.14	0.15116
c	-0.218404	-3.3	0.115181
c	-0.521776	-3.3	0.101253
c	-0.813776	-3.3	0.10933
c	-1.1836	-3.3	0.128357
c	-1.35534	-3.3	0.145247
c	-0.564646	-3.3	0.10941
c	-0.721249	-3.3	0.113993
c	-0.852001	-3.3	0.130209
c	-1.07205	-3.3	0.148098
c	-0.956831	-3.3	0.14022
c	-0.564646	-3.3	0.121085
c	-0.687795	-3.3	0.128022
c	-0.835501	-3.3	0.134771
c	-0.65521	-3.3	0.137545
c	-0.681015	-3.3	0.133681
c	-0.819013	-3.3	0.146488
c	-0.97269	-3.3	0.162092
c	-0.265801	-3.3	0.132919
c	-0.543167	-3.3	0.136508
c	-0.58346	-3.3	0.147758
c	-0.714077	-3.3	0.150316
c	-0.546009	-3.3	0.149267
c	-0.584134	-3.3	0.165811
c	-1.45774	-3.3	0.227261
c	-0.37108	-3.3	0.185947
c	-0.820385	-3.3	0.19425
c	-0.416571	-3.3	0.192101
c	-0.398701	-3.3	0.201001
c	-0.223746	-3.3	0.207278
c	-0.198572	-3.3	0.214354
c	-0.214768	-3.3	0.216485
c	-0.100062	-3.3	0.240293
c	-0.323805	-3.3	0.22843
c	-0.600375	-3.3	0.230327
c	-0.656667	-3.3	0.213427
c	-0.957095	-3.3	0.207347
c	-2.13803	-3.3	0.120973
c	-2.41557	-3.3	0.134258
c	-2.49326	-3.3	0.140636
c	-2.58789	-3.3	0.123898
c	-2.51612	-3.3	0.108698
c	-2.40095	-3.3	0.124147
c	-2.6113	-3.3	0.0835501
c	-2.33251	-3.3	0.0913554
c	-2.35505	-3.3	0.105609
c	-2.41728	-3.3	0.228079
c	0.181246	-3.3	0.23364
c	0.151864	-3.3	0.231726
c	0.17557	-3.3	0.227684
c	0.17557	-3.3	0.213713
c	0.116431	-3.3	0.190695
c	0.0503112	-3.3	0.196852
c	0.234907	-3.3	0.195957
c	0.263356	-3.3	0.182312
c	0.332039	-3.3	0.166062
c	0.275771	-3.3	0.220613
c	0.440206	-3.3	0.156405
c	0.611193	-3.3	0.0758539
c	0.528896	-3.3	0.187236
c	0.438926	-3.3	0.221159
c	0.426907	-3.3	0.233486
c	0.664501	-3.3	0.253434
c	0.721015	-3.3	0.228751
c	0.520319	-3.3	0.217684
c	0.724051	-3.3	0.192947
c	0.931481	-3.3	0.170014
c	1.23486	-3.3	0.175354
c	0.718945	-3.3	0.202884
c	0.794611	-3.3	0.242585
c	0.822986	-3.3	0.236298
c	0.82083	-3.3	0.228203
c	0.9375	-3.3	0.230489
c	1.07541	-3.3	0.228005
c	0.950371	-3.3	0.23843
c	1.03503	-3.3	0.245337
c	1.11579	-3.3	0.245873
c	1.09615	-3.3	0.248505
c	1.27458	-3.3	0.256638
c	1.19948	-3.3	0.229491
c	1.45455	-3.3	0.245675
c	1.52228	-3.3	0.239466
c	1.63102	-3.3	0.247489
c	1.68202	-3.3	0.253753
c	1.18521	-3.3	0.268874
c	1.77006	-3.3	0.290468
c	1.1835	-3.3	0.295166
c	1.73198	-3.3	0.323507
c	1.83026	-3.3	0.285324
c	1.98126	-3.3	0.309619
d	0.0772827	-3.14	0.199351
d	0.115522	-3.14	0.222669
d	0.144985	-3.14	0.246658
d	0.129785	-3.14	0.21892
d	0.143532	-3.14	0.229447
d	0.132213	-3.14	0.21336
d	0.149521	-3.14	0.217073
d	0.158704	-3.14	0.206262
d	0.14139	-3.14	0.181896
d	0.135352	-3.14	0.155599
d	0.16768	-3.14	0.149493
d	0.182001	-3.14	0.166015
d	0.196523	-3.14	0.17184
d	0.17183	-3.14	0.197
d	0.158266	-3.14	0.24138
d	0.194425	-3.14	0.168568
d	0.20786	-3.14	0.184343
d	0.210134	-3.14	0.191026
d	0.198023	-3.14	0.198638
d	0.229544	-3.14	0.214013
d	0.263815	-3.14	0.211806
d	0.243824	-3.14	0.197558
d	0.26025	-3.14	0.226675
d	0.221404	-3.14	0.272564
d	0.196523	-3.14	0.207023
d	0.256663	-3.14	0.123338
d	-0.0310775	-3.14	0.174299
d	-0.0611882	-3.14	0.139534
d	-0.0797402	-3.14	0.115434
d	-0.129995	-3.14	0.13564
d	0.0270104	-3.14	0.180151
d	0.0232621	-3.14	0.168298
d	0.0619556	-3.14	0.156065
d	0.102146	-3.14	0.164127
d	0.0932446	-3.14	0.199161
d	0.0904489	-3.14	0.203615
d	0.104282	-3.14	0.227027
d	0.117903	-3.14	0.223746
d	0.133513	-3.14	0.210791
d	0.131949	-3.14	0.222072
d	0.137498	-3.14	0.224785
d	0.140828	-3.14	0.218456
d	0.147689	-3.14	0.225512
d	0.160525	-3.14	0.250356
d	0.16344	-3.14	0.262506
d	0.172404	-3.14	0.272506
d	0.175022	-3.14	0.21898
d	0.186932	-3.14	0.20031
d	0.177237	-3.14	0.190082
d	0.202253	-3.14	0.20427
d	0.207347	-3.14	0.207305
d	0.221465	-3.14	0.182318
d	0.221404	-3.14	0.1785
d	0.204034	-3.14	0.265526
d	0.219905	-3.14	0.273334
d	0.0780901	-3.6	0.170291
d	0.11266	-3.6	0.205567
d	0.157268	-3.6	0.190169
d	0.156929	-3.6	0.207896
d	0.163502	-3.6	0.221579
d	0.189054	-3.6	0.243841
d	0.120759	-3.6	0.232536
d	-0.0219559	-3.6	0.141353
d	-0.0625745	-3.6	0.117693
d	-0.0514939	-3.6	0.158095
d	0.0615046	-3.6	0.148237
d	0.05625	-3.6	0.187101
d	0.0885031	-3.6	0.194008
d	0.0752396	-3.6	0.166527
d	0.0732548	-3.6	0.105409
d	0.00403887	-3.6	0.0863315
d	0.112572	-3.6	0.080292
d	0.200677	-3.6	0.129078
d	0.11173	-3.6	0.178333
d	0.127971	-3.6	0.170162
d	0.140563	-3.6	0.193682
d	0.154278	-3.6	0.210241
d	0.160679	-3.6	0.197639
d	0.149112	-3.6	0.185352
d	0.159757	-3.6	0.189003
d	0.168797	-3.6	0.164688
d	0.170529	-3.6	0.22819
d	0.184288	-3.6	0.189981
d	0.160752	-3.6	0.185788
d	0.166542	-3.6	0.182392
d	0.191837	-3.6	0.20496
d	0.190832	-3.6	0.177718
d	0.186436	-3.6	0.128347
d	0.202764	-3.6	0.166713
d	0.242097	-3.6	0.211582
d	0.240237	-3.6	0.23118
d	0.230426	-3.6	0.23829
e	-0.245675	-3.6	0.106524
e	-0.682541	-3.6	0.113647
e	-0.356389	-3.6	0.133226
e	-0.325625	-3.6	0.138051
e	-0.460502	-3.6	0.144382
e	-0.461418	-3.6	0.162141
e	-0.651249	-3.6	0.175007
e	-1.05548	-3.6	0.219187
e	-0.654737	-3.6	0.19807
e	-0.662127	-3.6	0.203749
e	-0.911211	-3.6	0.245966
e	-2.13203	-3.6	0.261754
e	-2.0471	-3.6	0.272482
e	-0.328034	-3.6	0.240566
e	-0.0912412	-3.6	0.178194
e	0.0225	-3.6	0.201852
e	0.0382425	-3.6	0.190648
e	0.149436	-3.6	0.196093
e	0.12816	-3.6	0.141718
e	0.137886	-3.6	0.0956155
e	0.37836	-3.6	0.110354
e	0.387467	-3.6	0.180126
e	0.198572	-3.6	0.238479
e	0.771297	-3.6	0.258353
e	0.945268	-3.6	0.287782
e	0.969706	-3.6	0.254338
e	1.16947	-3.6	0.288765
e	1.54442	-3.6	0.296891
e	1.18493	-3.6	0.260483
e	2.39635	-3.6	0.370412
e	2.35511	-3.6	0.324418
e	2.59904	-3.6	0.298873
e	1.90925	-3.6	0.312289
e	1.72866	-3.6	0.285785
e	0.932536	-3.6	0.158525
e	1.47017	-3.6	0.143226
e	1.48299	-3.6	0.164797
e	1.63593	-3.6	0.257962
e	1.00592	-3.6	0.163744
b	-0.09277	-3.14	1.36938
b	-0.82083	-3.14	1.64736
b	-1.56378	-3.14	1.63469
b	-1.05793	-3.14	1.52028
b	-1.26501	-3.14	1.6731
b	-0.735039	-3.14	1.87689
b	-0.561099	-3.14	1.89037
b	-0.3075	-3.14	1.9178
b	-0.09277	-3.14	1.98427
b	-0.341559	-3.14	2.02255
b	-0.397146	-3.14	2.13427
b	-0.292884	-3.14	2.22531
b	-0.275056	-3.14	2.3186
b	-0.173961	-3.14	2.48146
b	-0.511156	-3.14	2.23652
b	-0.578474	-3.14	2.22032
b	-0.912415	-3.14	2.01319
b	-0.874193	-3.14	2.05238
b	-1.02094	-3.14	2.14059
b	-1.71015	-3.14	2.28081
b	-2.16423	-3.14	2.69771
b	-1.86064	-3.14	2.57725
b	-1.13257	-3.14	2.31702
b	-0.981125	-3.14	2.30751
b	-0.876955	-3.14	2.40674
b	-1.31817	-3.14	2.56672
b	-1.41074	-3.14	2.64635
b	-1.33114	-3.14	2.34289
b	-1.35027	-3.14	2.23456
b	-0.556114	-3.14	2.25125
b	-1.97273	-3.14	2.35511
b	-1.44736	-3.14	2.57758
b	-1.69789	-3.14	2.63356
b	0.230068	-3.14	2.48097
b	0.218661	-3.14	2.31818
b	0.0403887	-3.14	2.12827
b	0.182638	-3.14	2.13013
b	0.431755	-3.14	2.27195
b	0.503004	-3.14	2.15136
b	-0.750974	-3.3	1.74026
b	-1.15298	-3.3	2.03917
b	-1.29405	-3.3	2.16407
b	-0.507624	-3.3	1.91397
b	-1.18614	-3.3	2.20406
b	-0.960615	-3.3	2.13214
b	-0.75605	-3.3	1.97365
b	-0.66484	-3.3	2.003
b	-0.764006	-3.3	2.01863
b	-0.789925	-3.3	2.08694
b	-0.7297	-3.3	2.01035
b	-0.587542	-3.3	2.08609
b	-1.19436	-3.3	2.37609
b	-0.909018	-3.3	2.18372
b	-0.144265	-3.3	2.16658
b	0.782089	-3.3	2.31277
b	1.35565	-3.3	2.65997
b	-0.772173	-3.3	1.28127
b	-1.49325	-3.3	1.84062
b	-0.960469	-3.3	1.71081
b	-1.54647	-3.3	2.22244
b	-1.16627	-3.3	2.07394
b	-0.929819	-3.3	1.88286
b	-0.231044	-3.3	1.66704
b	-0.553173	-3.3	1.74026
b	-0.407561	-3.3	1.85856
b	-0.425654	-3.3	2.07316
b	-0.986015	-3.3	2.26526
b	-1.05689	-3.3	2.28016
b	-0.392945	-3.3	2.14155
b	-0.9332	-3.3	2.37982
b	-0.130981	-3.3	2.26108
b	-0.528045	-3.3	2.25978
b	1.084	-3.3	1.77647
b	0.604669	-3.3	1.69838
b	0.667542	-3.3	1.97203
b	0.980551	-3.3	2.54321
b	-0.961435	-3.14	1.57214
b	-0.536761	-3.14	1.86255
b	-0.302335	-3.14	1.89027
b	-0.370245	-3.14	1.91824
b	-0.0975	-3.14	2.02475
b	-0.188099	-3.14	2.0541
b	-0.459034	-3.14	1.97939
b	-0.535081	-3.14	2.02619
b	-0.748874	-3.14	1.9725
b	-0.218404	-3.14	2.18342
b	-0.0375	-3.14	2.2428
b	-0.076485	-3.14	2.25036
b	-0.160331	-3.14	2.33201
b	-0.234427	-3.14	2.28596
b	-0.340156	-3.14	2.33405
b	-0.336832	-3.14	2.18738
b	-0.475111	-3.14	2.07917
b	-0.511156	-3.14	2.31172
b	-0.607824	-3.14	2.40566
b	-0.697299	-3.14	2.47461
b	-0.799269	-3.14	2.46973
b	-0.844041	-3.14	2.11521
b	-1.1147	-3.14	2.39419
b	-0.442055	-3.14	2.18334
b	-0.576915	-3.14	2.13012
b	0.120934	-3.14	2.26039
b	0.14151	-3.14	2.16553
b	0.266012	-3.14	2.05008
b	0.288629	-3.14	2.30426
b	0.39416	-3.14	1.60712
b	0.878812	-3.14	1.94094
b	0.84972	-3.14	2.28233
b	1.41355	-3.14	2.81098
b	0.961171	-3.14	1.67854
b	-0.138294	-2.8	2.23576
b	-0.015	-2.8	2.20654
b	-0.294894	-2.8	2.29762
b	-0.197294	-2.8	2.18573
b	-0.375075	-2.8	2.25292
b	-0.567825	-2.8	2.27214
b	-0.738589	-2.8	2.29813
b	-0.840435	-2.8	2.37076
b	-0.595719	-2.8	2.18441
b	-0.493235	-2.8	2.13286
b	-0.314821	-2.8	2.12132
b	-0.417986	-2.8	2.05588
b	-0.495737	-2.8	2.01804
b	-0.731202	-2.8	2.05588
b	-0.494431	-2.8	1.9366
b	-0.73992	-2.8	2.19185
b	-0.364966	-2.8	2.11608
b	-0.495737	-2.8	1.95303
b	0.102011	-2.8	2.20103
b	0.0670825	-2.8	2.07209
b	0.0912412	-2.8	1.8427
b	0.275159	-2.8	1.82621
b	0.247386	-2.8	2.17982
b	0.506514	-2.8	2.11995
b	0.285591	-2.8	2.01148
b	0.31864	-2.8	1.97331
b	0.434547	-2.8	1.94713
b	1.05473	-2.8	2.17718
b	-0.0503113	-2.8	2.02385
b	-0.228474	-2.8	1.93532
b	-0.379251	-2.8	1.93065
b	-0.372441	-2.8	2.00497
b	-0.352181	-2.8	1.99089
b	-0.93666	-2.8	1.85183
b	-1.18571	-2.8	1.86666
b	-0.758056	-2.8	1.92557
b	-0.7014	-2.8	1.98835
b	-0.86077	-2.8	2.01069
b	-0.964122	-2.8	2.03731
b	-1.21844	-2.8	2.11047
b	-0.93753	-2.8	2.10189
b	-0.423467	-2.8	2.17756
b	-0.171355	-2.8	2.24544
b	-0.525054	-2.8	2.20843
b	-0.69232	-2.8	2.16158
b	-0.993176	-2.8	2.14767
b	-0.885794	-2.8	2.30063
b	-1.05577	-2.8	2.24966
b	-1.13051	-2.8	2.28355
b	-0.951555	-2.8	2.18131
b	0.0571187	-2.8	2.15283
b	0.104194	-2.8	2.1572
b	0.167705	-2.8	2.01951
b	0.198147	-2.8	2.10638
b	0.333139	-2.8	2.2574
b	0.493976	-2.8	2.12667
b	0.863282	-2.8	2.31525
b	1.07016	-2.8	2.55203
b	-0.191214	-2.56	1.85054
b	-0.228474	-2.56	1.90956
b	-0.620509	-2.56	1.91768
b	-0.248294	-2.56	2.079
b	-0.238354	-2.56	2.17756
b	-0.416571	-2.56	2.27241
b	-0.490434	-2.56	2.18755
b	-0.731817	-2.56	2.33068
b	0.123009	-2.56	2.15448
b	0.15	-2.56	1.9254
b	0.329317	-2.56	2.2845
b	0.332209	-2.56	1.87897
b	0.507014	-2.56	2.15767
b	0.533976	-2.56	2.18549
b	0.680519	-2.56	2.20956
b	0.756349	-2.56	2.02653

## Sheet: Temporal (antero)
Injection site	DV	AP	ML
e	-0.16	-3.3	0.448679		a	PL
e	-0.0375837	-3.3	0.550255		b	PL
e	-0.085	-3.3	0.551345		c	IL/MO
e	-0.1025	-3.3	0.576465		d	VO/VLO
e	-0.122525	-3.3	0.636931		e	VLO/LO
e	-0.242512	-3.3	0.616209		f	LO/DLO
e	-0.1475	-3.3	0.602293		g	DLO
e	-0.452562	-3.3	0.672277
e	-0.462669	-3.3	0.675171
e	-0.41503	-3.3	0.680376
e	-0.3925	-3.3	0.696824
e	-0.467506	-3.3	0.809216
e	-0.437529	-3.3	0.867255
e	-0.45	-3.3	0.668291
e	-0.517524	-3.3	0.939565
e	-0.570022	-3.3	0.869166
e	-0.547506	-3.3	0.773082
e	-0.580049	-3.3	0.743862
e	-0.402531	-3.3	0.767157
e	0.03	-3.3	0.952897
e	0.130024	-3.3	0.722932
e	-0.470665	-3.6	0.592505
e	-0.540832	-3.6	0.602546
e	-0.610513	-3.6	0.5026
e	-0.467608	-3.6	0.71254
e	-0.547962	-3.6	0.715109
e	-0.675074	-3.6	0.632678
e	-0.185152	-3.6	0.63561
e	-0.187566	-3.6	0.820735
e	-0.345326	-3.6	0.625545
e	-0.372634	-3.6	0.819977
e	-0.567505	-3.6	0.657695
e	-0.355035	-3.6	0.627236
e	-0.407622	-3.6	0.626124
e	-0.63752	-3.6	0.701129
e	-0.665019	-3.6	0.685356
e	-0.722569	-3.6	0.612475
e	-0.630045	-3.6	0.634281
e	-0.580005	-3.6	0.566242
e	-0.632579	-3.6	0.548025
e	-0.707571	-3.6	0.632742
e	-0.69504	-3.6	0.545281
e	-0.627545	-3.6	0.5633
e	-0.597631	-3.6	0.773644
e	-0.517718	-3.6	0.600026
f	-0.445007	-3.14	0.572636
f	-0.515	-3.14	0.55046
f	-0.490057	-3.14	0.495158
f	-0.510006	-3.14	0.682574
f	-0.311217	-3.6	0.765286
f	-0.397555	-3.6	0.721084
f	-0.412742	-3.6	0.771791
f	0.38866	-3.6	0.797469
f	-0.476681	-3.6	0.812054
f	-0.588069	-3.6	0.585902
f	-0.569485	-3.6	0.456097
f	-0.45947	-3.6	0.547289
f	-0.62266	-3.6	0.575917
f	-0.311006	-3.6	0.577072
f	-0.469661	-3.6	0.697105
f	-0.302995	-4.3	0.552099
f	-0.429941	-4.3	0.439104
f	-0.388852	-4.3	0.598132
f	-0.581985	-4.3	0.556607
g	-0.035	-3.8	0.350321
g	-0.112611	-3.8	0.495025
g	-0.310091	-3.8	0.591355
g	-0.352819	-3.8	0.603019
g	-0.605744	-3.8	0.476681
g	0.1425	-3.8	0.462669
g	0.19	-3.8	0.310372
g	0.255049	-3.8	0.234654
g	0.435	-3.8	0.540427
g	0.452527	-3.8	0.543421
g	0.115027	-3.8	0.546271
g	0.1725	-3.8	0.497293
a	-0.380214	-2.8	0.487648
a	-0.214665	-2.8	0.529209
a	-0.5324	-2.8	0.564546
a	-0.607602	-2.8	0.458482
a	-0.61438	-2.8	0.38866
a	-0.698502	-2.8	0.443226
a	-0.71261	-2.8	0.457506
a	-0.637887	-2.8	0.447675
a	-0.592463	-2.8	0.515219
a	-0.539676	-2.8	0.511566
a	-0.699732	-2.8	0.776305
a	-0.980796	-2.8	0.705979
a	-0.953235	-2.8	0.721409
a	-0.966505	-2.8	0.745294
a	-0.092635	-3.3	0.461099
a	-0.133089	-3.3	0.496601
a	-0.289061	-3.3	0.470804
a	-0.440639	-3.3	0.545006
a	-0.477657	-3.3	0.531377
a	-0.483735	-3.3	0.500363
a	-0.550482	-3.3	0.459
a	-0.511334	-3.3	0.47101
a	-0.540231	-3.3	0.416474
a	0.0930387	-3.3	0.403245
a	0.148535	-3.3	0.479087
a	0.45698	-3.3	0.288119
a	0.181727	-3.3	0.854174
c	-0.256479	-4.16	0.0776612
c	-0.249022	-4.16	0.0958187
c	-0.294035	-4.16	0.206911
c	-0.290269	-4.16	0.0934075
c	0.0990575	-4.16	0.400031
c	0.810078	-4.16	0.877941
c	0.366274	-4.16	0.512884
c	-0.547962	-4.16	0.376007
c	-0.431856	-3.6	0.440859
c	-0.427566	-3.6	0.377128
c	-0.393009	-3.6	0.275011
c	-0.437529	-3.6	0.257609
c	-0.402507	-3.6	0.227994
c	-0.770004	-3.6	0.105948
c	0.807515	-3.6	0.0798825
c	-0.709265	-3.6	0.447109
c	-0.738216	-3.6	0.587904
c	-0.78443	-3.6	0.714532
c	-0.130384	-3.6	0.503717
d	-0.08489	-4.16	0.230014
d	-0.241725	-4.16	0.416924
d	-0.392507	-4.16	0.586541
d	-0.339577	-4.16	0.07357
d	-0.550567	-4.16	0.185
d	-0.657519	-4.16	0.453059
d	-0.691995	-4.16	0.563749
d	-0.701966	-4.16	0.525744
d	-0.303531	-4.16	0.775487
d	-0.235212	-4.16	0.731544
d	0.00559	-4.16	0.237829
d	0.005	-4.16	0.4675
d	0.130096	-4.16	0.38779
d	0.140089	-4.16	0.436929
d	0.490879	-4.16	0.724676
d	0.651081	-4.16	0.781312
d	0.655176	-4.16	0.655176
d	0.818481	-4.16	0.701231
d	0.838429	-4.16	0.907004
d	0.159471	-4.16	0.415519
d	0.885579	-4.16	0.267231
b	-0.408182	-3.3	0.677039
b	-0.384334	-3.3	0.885286
b	-0.175089	-3.3	0.322849
b	-0.838694	-3.3	0.745222
b	-1.99535	-3.3	2.25021
b	-0.120934	-3.8	0.720039
b	-0.226122	-3.8	0.779604
b	-0.225125	-3.8	0.807531
b	-0.03	-3.8	0.691995
b	-0.195144	-3.8	1.01403
b	-0.2625	-3.8	1.15784
b	-0.225	-3.8	0.204795
b	-0.322587	-3.8	0.216966
b	-0.585193	-3.8	0.245835
b	-0.458482	-3.8	0.245835
b	-0.375075	-3.8	1.21537
b	-0.577549	-3.8	0.517911
b	-0.6075	-3.8	0.495343
b	-0.292596	-3.8	0.405625
b	-0.1875	-3.8	0.442849
b	-0.113495	-3.8	0.464326
b	-0.0106062	-3.8	0.328855
b	0.0986475	-3.8	0.735344
b	0.0075	-3.8	0.840836

## Sheet: Sensory-motor (retro)
Injection site	DV	AP	ML
f	0.240013	1.3	0.802815		a	PL
f	0.307591	1.3	0.815751		b	PL
f	0.342646	1.3	0.892556		c	IL/MO
f	0.402694	1.3	0.962504		d	VO/VLO
f	0.305041	1.3	0.99352		e	VLO/LO
f	0.2801	1.3	0.930004		f	LO/DLO
f	0.355316	1.3	1.01761		g	DLO
f	0.215523	1.3	1.1425
f	0.307591	1.3	1.17754
f	0.347725	1.3	1.1925
f	0.52265	1.3	1.18526
f	0.507894	1.3	1.21526
f	0.55509	1.3	1.015
f	0.60013	1.3	0.965004
f	0.650044	1.3	1.15251
f	0.755037	1.3	1.00165
f	0.900127	1.7	1.25
f	0.965074	1.7	1.39501
f	0.957616	1.7	1.41751
f	1.00285	1.7	1.41251
f	1.0951	1.7	1.49501
f	1.12259	1.7	1.51756
f	1.09	1.7	1.51517
f	1.06754	1.7	1.54516
f	1.0377	1.7	1.42253
f	0.99511	1.7	1.53506
f	1.025	1.7	1.55253
f	1.0475	1.7	1.57015
f	1.04752	1.7	1.61251
f	1.07502	1.7	1.6375
f	1.06756	1.7	1.65251
f	1.045	1.7	1.7075
f	1.03754	1.7	1.74004
f	1.03	1.7	1.77004
f	1.00004	1.7	1.565
f	1.7606	1.7	0.995029
f	1.68009	1.7	0.967529
f	1.61673	1.7	1.03003
f	1.55171	1.7	1.03255
f	1.47647	1.7	1.0303
f	1.48039	1.7	1.0625
f	1.55596	1.7	1.09018
f	1.54922	1.7	1.09257
f	1.55745	1.7	1.08292
f	1.56106	1.7	1.15033
f	1.55743	1.7	1.1975
f	1.52804	1.7	1.12518
f	1.56749	1.7	1.11313
f	1.52751	1.7	1.18545
f	1.4958	1.7	1.22754
f	1.45544	1.7	1.20287
f	1.44964	1.7	1.22543
f	1.63683	1.7	1.21853
f	1.55081	1.7	1.24806
f	1.50917	1.7	1.26036
f	1.54897	1.7	1.18052
f	1.17516	1.7	1.23281
f	1.25743	1.7	1.2502
f	1.1952	1.7	1.26792
f	1.20035	1.7	1.2553
f	1.26777	1.7	1.23501
f	1.23988	1.7	1.13007
f	1.25516	1.7	1.2509
f	1.26898	1.7	1.09273
f	1.19179	1.7	1.13752
f	1.39415	1.7	1.17002
f	1.45431	1.7	1.07264
f	1.26351	1.7	1.22308
f	1.50461	1.7	1.15811
f	1.54156	1.7	1.1492
f	1.6069	1.7	1.20513
a	0.827561	2.2	1.05286
a	0.9575	2.2	1.03037
a	0.8625	2.2	1.11305
a	1.05772	2.2	1.09505
a	1.05761	2.2	1.15504
a	1.11507	2.2	1.02255
a	1.16269	2.2	1.10534
a	1.19251	2.2	0.0625025
a	1.3025	2.2	1.02001
a	1.28003	2.2	0.0650262
a	1.25751	2.2	0.112511
a	1.185	2.2	1.09751
a	1.18506	2.2	1.1751
a	1.24501	2.2	1.15251
a	1.28251	2.2	1.19
a	1.34253	2.2	1.25752
a	1.385	2.2	1.27254
a	1.39508	2.2	1.22031
a	1.43	2.2	1.18276
a	1.50754	2.2	1.16004
a	1.49507	2.2	1.14257
a	1.30253	2.2	1.16502
a	1.39755	2.2	1.15502
a	1.62759	2.2	1.12504
a	1.59002	2.2	1.15504
a	1.54004	2.2	1.13007
a	1.52752	2.2	1.09035
a	1.3775	2.2	1.085
a	1.44274	2.2	1.11004
a	1.46029	2.2	1.1551
a	1.38787	2.2	1.18817
a	1.45001	2.2	1.24
a	1.34501	2.2	1.21763
a	1.35251	2.2	1.25762
a	1.37	2.2	1.23504
a	1.41005	2.2	1.2225
a	1.32755	2.2	1.2775
a	1.37008	2.2	1.2575
a	1.28255	2.2	1.19759
a	1.32271	2.2	1.2225
a	1.46023	2.2	1.255
a	1.43014	2.2	1.1825
a	1.39	2.2	1.25
a	1.24681	2.2	1.04265
a	1.26487	2.2	1.09556
a	1.33507	2.2	1.1226
a	1.39042	2.2	1.09126
a	1.37923	2.2	1.03834
a	1.46243	2.2	1.05883
a	1.49531	2.2	1.07994
a	1.49596	2.2	1.09435
a	1.52333	2.2	1.08439
a	1.58371	2.2	1.07654
a	1.61793	2.2	1.0789
a	1.4623	2.2	1.05144
a	1.47208	2.2	1.01297
a	1.42981	2.2	1.05203
a	1.40574	2.2	1.04645
a	1.34626	2.2	1.05517
a	1.33121	2.2	1.07919
a	1.40202	2.2	1.10472
a	1.42997	2.2	1.11555
a	1.49295	2.2	1.08439
a	1.52595	2.2	1.04358
a	1.57061	2.2	1.0469
a	1.51357	2.2	1.0229
a	1.47489	2.2	1.03042
a	1.34001	2.2	1.06175
a	1.3888	2.2	1.10644
a	1.46577	2.2	1.14554
a	1.48265	2.2	1.10957
a	1.49586	2.2	1.10865
a	1.52594	2.2	1.10764
a	1.52727	2.2	1.19043
a	1.42048	2.2	1.1908
a	1.44242	2.2	1.16362
a	1.56974	2.2	1.16288
a	1.56906	2.2	1.13678
a	1.47179	2.2	1.13414
a	1.51503	2.2	1.12007
a	1.65398	2.2	1.13036
a	1.59266	2.2	1.12171
a	1.52265	2.2	1.11759
a	1.5371	2.2	1.16174
a	1.37399	2.2	1.14826
a	1.49937	2.2	1.17941
a	1.52194	2.2	1.17291
a	1.59823	2.2	1.19136
a	1.6195	2.2	1.20843
a	1.61469	2.2	1.2043
a	1.66284	2.2	1.21543
a	1.67801	2.2	1.16152
a	1.44798	2.2	1.15402
a	1.52555	2.2	1.13845
a	1.6121	2.2	1.22068
a	1.64976	2.2	1.18935
a	0.875056	1.6	1.13876
a	0.960021	1.6	1.1464
a	0.99	1.6	1.17875
a	1.0125	1.6	1.17875
a	0.957505	1.6	1.1413
a	1.0125	1.6	1.23638
a	1.00758	1.6	1.26625
a	1.03512	1.6	1.28632
a	0.995045	1.6	1.22375
a	0.99508	1.6	1.23643
a	0.960132	1.6	1.32641
a	0.995005	1.6	1.2288
a	1.06254	1.6	1.31127
a	0.967521	1.6	1.36625
a	1.00752	1.6	1.33891
a	1.05502	1.6	1.38377
a	1.0675	1.6	1.419
a	1.02504	1.6	1.44376
a	1.0375	1.6	1.47125
a	1.0975	1.6	1.48875
a	1.1475	1.6	1.42875
a	1.18256	1.6	1.37135
a	1.21287	1.6	1.35629
g	0.5375	2.2	1.0775
g	0.615	2.2	1.0575
g	0.6481	2.2	1.11004
g	0.685	2.2	1.1175
g	0.5875	2.2	1.1525
g	0.58	2.2	0.116
g	0.605036	2.2	0.113
g	0.667521	2.2	1.185
g	0.68	2.2	1.2775
g	0.715016	2.2	1.325
g	0.720061	2.2	1.3975
g	0.740056	2.2	1.37751
g	0.71	2.2	1.40251
g	0.772512	2.2	1.4175
g	0.7625	2.2	1.43753
g	0.85015	2.2	1.43253
g	0.845152	2.2	1.42257
g	0.777692	2.2	1.43751
g	0.8025	2.2	1.45251
g	0.835039	2.2	1.49001
g	0.81751	2.2	1.49751
g	0.902507	2.2	1.5075
g	0.947507	2.2	1.52766
g	1.0276	2.2	1.525
g	1.02001	2.2	1.56755
g	1.02765	2.2	1.52756
g	1.03522	2.2	1.52281
g	0.917625	2.2	1.52502
g	0.797679	2.2	1.52251
g	0.835039	2.2	1.53501
g	0.815095	2.2	1.55755
g	0.8475	2.2	1.55752
g	0.875009	2.2	1.56015
g	0.892509	2.2	1.57502
g	0.9025	2.2	1.59752
g	0.840039	2.2	1.61
g	0.855009	2.2	1.60752
g	0.880009	2.2	1.62255
g	0.757709	2.2	1.62
g	0.840087	2.2	1.60251
g	0.847736	2.2	1.67
g	0.905129	2.2	1.75252
g	0.937507	2.2	1.76257
g	0.942765	2.2	1.91
g	0.975109	2.2	1.60252
g	1.03751	2.2	1.655
g	1.04002	2.2	1.67008
g	1.01252	2.2	1.6575
g	0.75521	2.2	1.66255
g	0.8175	2.2	1.68252
g	0.7677	2.2	1.64508
g	0.735	2.2	1.6625
g	0.915126	2.2	1.68752
g	0.962564	2.2	1.70512
g	0.905033	2.2	1.74007
g	0.93262	2.2	1.73016
g	0.972671	2.2	1.7775
g	1.04751	2.2	1.805
g	1.0833	2.2	1.83002
g	1.0775	2.2	1.72757
g	1.13513	2.2	1.72751
g	1.18502	2.2	1.75254
g	1.21022	2.2	1.73272
g	1.20516	2.2	1.77765
g	0.947529	2.2	1.7875
g	0.970249	2.2	1.7725
g	1.0125	2.2	1.79002
g	1.04765	2.2	1.75004
g	1.10763	2.2	1.75516
g	1.15	2.2	1.76504
g	1.05029	2.2	1.7876
g	1.03015	2.2	1.8075
g	1.06259	2.2	1.79752
g	1.11252	2.2	1.82503
g	1.1275	2.2	1.8075
g	1.145	2.2	1.84753
g	1.16531	2.2	1.87006
g	0.932689	2.2	1.865
g	0.987526	2.2	1.8325
g	1.03251	2.2	1.85251
g	1.09505	2.2	1.81504
g	0.95535	2.2	1.825
g	1.0151	2.2	1.84269
g	1.03299	2.2	1.8625
g	1.05009	2.2	1.89273
g	1.01016	2.2	1.93259
g	1.0303	2.2	1.94284
g	1.07759	2.2	1.95512
g	1.08264	2.2	1.8975
g	1.19257	2.2	1.88013
g	1.19762	2.2	1.8625
g	1.10255	2.2	1.8725
g	1.13268	2.2	1.865
g	1.09519	2.2	1.895
g	1.07264	2.2	1.91759
g	1.05514	2.2	1.8975
g	1.07264	2.2	1.86763
g	1.07505	2.2	1.975
g	1.17002	2.2	2.04755
g	1.20254	2.2	2.08
g	1.25271	2.2	2.17502
g	1.28007	2.2	2.2175
g	1.28504	2.2	2.2175
g	1.25752	2.2	2.2075
g	1.335	2.2	2.23001
g	1.03001	2.2	2.2275
g	1.05505	2.2	2.2275
g	1.09005	2.2	2.245
g	1.15008	2.2	2.13007
g	1.18504	2.2	2.18502
g	1.21004	2.2	2.22501
g	1.30014	2.2	2.25775
g	1.05764	2.2	1.94017
g	1.14032	2.2	2.21502
g	1.15799	2.2	2.1775
g	1.18023	2.2	2.09269
g	1.12752	2.2	2.01001
g	1.15512	2.2	2.0125
g	1.18004	2.2	2.03515
g	1.18267	2.2	2.05003
g	1.26	2.2	2.04505
g	1.16508	2.2	2.03008
g	1.22761	2.2	1.96
g	1.04765	2.2	1.97
g	1.08305	2.2	2.00001
g	1.11252	2.2	2.01251
g	1.1853	2.2	2.0775
g	1.23	2.2	2.10264
g	1.2677	2.2	2.12018
g	1.30014	2.2	2.1275
g	1.39773	2.2	2.11757
g	1.03265	2.2	2.11
g	1.1	2.2	2.16772
g	1.10755	2.2	2.26271
g	1.15518	2.2	2.04255
g	1.19766	2.2	1.95767
g	1.23761	2.2	2.00253
g	1.33025	2.2	1.98
g	1.13782	2.2	2.04003
g	1.07009	2.2	2.1125
g	1.06752	2.2	2.13
g	1.07502	2.2	2.165
g	1.15751	2.2	2.20254
g	1.19254	2.2	2.10753
g	1.22	2.2	2.18757
g	1.24002	2.2	2.115
g	1.28757	2.2	2.02508
g	1.2851	2.2	2.12501
g	1.26252	2.2	2.20252
g	1.3425	2.2	2.0175
g	1.36506	2.2	1.99266
g	1.39001	2.2	2.13
g	1.43	2.2	2.23757
g	1.41522	2.2	1.77002
g	1.50005	2.2	1.78257
g	1.50258	2.2	1.8326
g	1.50505	2.2	1.88009
e	1.365	1.7	3.11708
e	0.7875	1.7	3.04995
e	0.255	1.7	3.08708
e	0.840836	1.7	3.51463
e	0.982615	1.7	3.95708
e	1.28305	1.7	4.01711
e	0.592548	1.7	4.51274
e	1.17002	1.7	4.92529
e	1.365	1.7	5.05959
e	0.855032	1.7	5.62209
e	0.803376	1.7	3.63462
e	0.6075	1.7	6.00466
e	1.17788	1.7	6.06458
e	2.72399	1.7	5.56968
e	3.8721	1.7	5.66793
e	4.3051	1.7	4.16717
e	4.26264	1.7	3.52213
e	4.40302	1.7	3.36465
e	3.75003	1.7	3.04208
e	3.85526	1.7	6.24466
e	3.95253	1.7	6.62746
e	3.7731	1.7	5.93823
c	3.36886	2.2	3.6345
c	3.86064	2.2	3.34269
c	3.76893	2.2	3.26021
c	3.64947	2.2	3.1799
c	3.24535	2.2	3.106
c	3.14771	2.2	3.27435
c	3.01997	2.2	3.14815
c	3.23292	2.2	3.00911
c	2.65886	2.2	2.66444
c	2.40198	2.2	2.28288
c	2.49376	2.2	2.03749
c	3.73196	2.2	3.01232
c	3.88022	2.2	2.97685
c	3.9919	2.2	2.89785
c	4.0069	2.2	2.89987
c	4.03333	2.2	2.85325
c	4.02157	2.2	2.76444
c	4.20473	2.2	2.71746
c	4.28489	2.2	2.683
c	4.34437	2.2	2.44786
c	3.88732	2.2	2.83966
c	3.02607	2.2	2.19649
c	3.29284	2.2	2.02364
c	2.83028	2.2	2.27651
c	3.88025	2.2	3.24421
c	3.02242	2.2	3.69905
c	2.95939	2.2	3.43763
c	3.76321	2.2	3.47126
c	4.62993	2.2	2.52466
c	4.37774	2.2	2.59358
c	4.29551	2.2	2.6206
c	4.24033	2.2	2.62149
c	4.18928	2.2	2.64209
c	4.12188	2.2	2.69034
c	3.95005	2.2	2.66946
c	4.07371	2.2	2.74259
c	3.84015	2.2	2.78848
c	3.62774	2.2	2.84259
c	3.71444	2.2	2.95683
c	3.63694	2.2	2.95931
c	3.47251	2.2	3.09688
c	3.18171	2.2	3.10798
c	3.19134	2.2	1.73599
c	3.0484	2.2	1.41796
c	1.64754	2.2	0.736873
c	1.61224	2.2	0.872066
c	0.898655	2.2	0.532552
c	1.46979	2.2	1.14838
c	0.76076	2.2	0.862532
c	0.789783	2.2	0.81781
c	1.72134	2.2	1.36502
c	1.92471	2.2	1.35882
c	2.31968	2.2	1.53767
c	2.27862	2.2	1.3979
c	2.58559	2.2	1.65109
c	2.65464	2.2	1.3955
c	2.71646	2.2	1.4433
c	2.64767	2.2	2.43094
c	2.06827	2.2	2.06827
c	2.51228	2.2	2.68213
c	2.8123	2.2	2.80328
c	2.58859	2.2	2.95725
c	3.46876	2.2	3.31798
c	3.71632	2.2	3.08381
c	3.87054	2.2	2.74562
c	3.38086	1.7	3.44403
c	3.11338	1.7	3.38086
c	3.19951	1.7	3.29974
c	3.03111	1.7	3.19638
c	2.57552	1.7	3.03966
c	2.64791	1.7	2.95725
c	2.59705	1.7	2.87914
c	2.5202	1.7	2.72168
c	2.95471	1.7	2.79037
c	3.88313	1.7	2.67398
c	3.83194	1.7	2.52968
c	4.09479	1.7	2.63379
c	4.17397	1.7	2.61424
c	3.91304	1.7	2.54564
c	4.02505	1.7	2.36245
c	3.16415	1.7	2.93366
c	3.71269	1.7	3.40821
c	3.69116	1.7	2.73372
c	4.10299	1.7	2.56685
c	2.03305	1.7	1.72471
c	2.15845	1.7	1.785
c	1.50623	1.7	1.49031
c	1.36046	1.7	1.22436
c	1.49267	1.7	1.23461
c	2.57129	1.7	1.55366
c	1.23534	1.7	2.19751
d	3.80253	1.2	3.81777
d	3.90768	1.2	3.78753
d	3.87751	1.2	3.76512
d	3.74257	1.2	3.75769
d	3.81019	1.2	3.69062
d	3.64503	1.2	3.59253
d	3.83253	1.2	3.66049
d	3.54013	1.2	3.79519
d	3.54007	1.2	3.69062
d	3.4729	1.2	3.75012
d	3.4204	1.2	3.70527
d	3.4053	1.2	3.65288
d	3.33003	1.2	3.4575
d	3.27014	1.2	3.59595
d	3.18022	1.2	3.72037
d	3.01575	1.2	3.90854
d	3.00034	1.2	4.03501
d	2.95515	1.2	4.17055
d	2.86619	1.2	4.08006
d	2.83501	1.2	3.66049
d	3.41517	1.2	3.81777
d	2.9781	1.2	4.21202
d	2.75259	1.2	4.3351
d	2.70834	1.2	4.4851
d	2.70004	1.2	4.5601
d	2.62587	1.2	4.6956
d	2.56517	1.2	4.83005
d	2.49018	1.2	4.9502
d	2.445	1.2	2.49254
d	3.72777	1	3.73512
d	3.675	1	3.70024
d	3.45763	1	3.593
d	3.61538	1	3.51003
d	3.65253	1	3.46529
d	3.59257	1	3.5705
d	3.57007	1	3.27753
d	3.68587	1	3.18001
d	3.93756	1	3.18149
d	3.9762	1	3.10573
d	3.66077	1	2.94784
d	3.41271	1	2.62501
d	3.67507	1	2.7375
d	3.765	1	2.76759
d	5.06392	1	1.95013
d	4.78521	1	2.05534
d	4.77002	1	2.1975
d	4.41791	1	2.23626
d	4.08833	1	2.37076
d	3.60751	1	2.69335
d	4.21533	1	2.36369
d	4.72038	1	2.17521
d	4.5405	1	2.46073
d	4.28274	1	2.54278
d	3.85507	1	3.41251
d	3.98251	1	3.36751
d	4.21716	1	2.85892
d	4.11833	1	2.73898
d	4.45503	1	2.79049
d	3.68253	1	3.82501
d	3.24003	1	3.7275
d	2.9925	1	3.495
d	3.16503	1	3.02432
d	3.00758	1	3.47316
d	3.27008	1	3.49513
d	3.45013	1	3.56253
d	3.58507	1	3.69037
d	3.68269	1	3.57003
d	3.59251	1	3.17293
d	3.69753	1	3.20258
d	3.64538	1	3.21821
d	3.60813	1	2.96311
d	3.83257	1	2.94784
d	3.97681	1	2.67009
d	3.82518	1	2.58027
d	4.0057	1	2.92504
d	4.12544	1	2.87275
d	4.3446	1	2.6925
d	4.2676	1	2.51251
d	4.62049	1	2.59656
d	4.85418	1	2.4525
d	4.77029	1	2.44505
d	4.21501	1	2.81275
d	3.94503	1	2.95501
d	3.54757	1	3.19522
d	3.45117	1	2.77671
b	1.77452	1.6	1.91726
b	1.76696	1.6	2.16105
b	1.91181	1.6	2.07136
b	1.86896	1.6	2.1675
b	2.45044	1.6	2.08728
b	2.4016	1.6	2.04666
b	2.00983	1.6	2.46073
b	2.20844	1.6	2.37627
b	2.16845	1.6	2.7105
b	2.42063	1.6	2.77759
b	2.56068	1.6	2.95254
b	2.34751	1.6	2.96592
b	2.52005	1.6	3.23838
b	2.77565	1.6	3.22033
b	3.15266	1.6	2.75888
b	3.33062	1.6	2.80757
b	3.18986	1.6	2.34751
b	3.79996	1.6	2.56031
b	4.07299	1.6	2.91913
b	4.1514	1.6	2.58754
b	3.69842	1.6	3.60312
b	3.26253	1.6	3.05265
b	0.841205	1.7	0.765919
b	1.71855	1.7	1.24405
b	1.83038	1.7	1.32417
b	2.86641	1.7	1.80156
b	3.07545	1.7	1.74752
b	2.8583	1.7	1.22287
b	3.15782	1.7	1.71765
b	2.91035	1.7	2.17546
b	2.76815	1.7	2.19082
b	2.44529	1.7	2.1902
b	2.75397	1.7	2.45365
b	1.69541	1.7	2.47868
b	1.56779	1.7	2.68803
b	2.10835	1.7	2.875
b	2.01	1.7	3.15394
b	2.23545	1.7	3.03491
b	2.50398	1.7	2.74951
b	2.29026	1.7	3.65447
b	2.41087	1.7	3.54318
b	2.75287	1.7	3.77414
b	3.71251	1.7	3.73717
b	3.59313	1.7	3.43827
b	3.87046	1.7	3.69945
b	3.76049	1.7	3.39518
b	3.88989	1.7	3.24105
b	3.48158	1.7	3.1288
b	3.40226	1.7	3.1373
b	4.07253	1.7	3.06882
b	4.05251	1.7	2.91024
b	3.11608	1.7	2.32501

## Sheet: Sensory-motor (antero)
Injection site	DV	AP	ML
a	1.13278	1.2	0.375075		a	PL
a	1.10073	1.2	0.545091		b	PL
a	1.20308	1.2	0.545091		c	IL/MO
a	1.25074	1.2	0.530094		d	VO/VLO
a	1.31086	1.2	0.69576		e	VLO/LO
a	1.35533	1.2	0.8175		f	LO/DLO
a	1.37091	1.2	0.83506		g	DLO
a	1.35122	1.2	0.862504
a	0.870606	1.1	0.535986
a	0.933585	1.1	0.620509
a	0.978909	1.1	0.607464
a	0.936766	1.1	0.77523
a	0.557859	1.1	0.746847
a	0.597505	1.1	0.826144
a	1.0846	1.1	0.583406
a	1.16827	1.1	0.838455
a	1.19044	1.1	0.62258
a	1.00387	1.1	0.840134
a	1.045	1.1	0.86831
a	1.23079	1.1	0.713131
a	1.33683	1.1	0.76569
a	0.417889	1	0.555614
a	0.485599	1	0.665794
a	0.514114	1	0.707788
a	0.49745	1	0.763385
a	0.390545	1	0.715616
a	0.58992	1	0.827696
a	0.435007	0.9	0.766045
a	0.417687	0.9	0.786436
a	0.492506	0.9	0.753997
a	0.570137	0.9	0.735833
a	0.598022	0.9	0.85868
a	0.58784	0.9	0.894686
a	0.472526	0.9	0.948819
e	0.560451	1.6	0.387507
e	0.650692	1.6	0.232514
e	0.708365	1.6	0.16
e	0.66017	1.6	0.535286
e	0.43785	1.6	0.382631
e	0.75265	1.6	0.7375
e	0.760148	1.6	0.870014
e	0.675074	1.6	0.613647
e	1.025	1.6	0.710281
e	1.05507	1.6	0.800035
e	0.825185	1.6	1.15751
e	0.940004	1.6	1.15754
e	0.985621	1.6	1.17013
e	0.997613	1.6	1.1675
e	1.02503	1.6	1.1675
e	1.09343	1.6	0.665005
e	1.10863	1.6	0.627505
e	1.06542	1.6	0.395071
e	1.11648	1.6	0.3725
e	1.22074	1.6	0.51
e	1.25849	1.6	0.657505
e	1.50047	1.6	1.24501
f	0.681439	1.4	0.544088
f	0.777125	1.4	0.824491
f	0.836182	1.4	0.906027
f	1.11713	1.4	0.696927
f	1.00846	1.4	0.962141
f	1.11116	1.4	0.718685
f	1.06874	1.4	0.571944
f	0.803015	1.4	0.501196
f	0.596766	1.4	0.71239
f	0.741454	1.4	0.608655
g	0.385437	1.2	0.23585
g	0.398411	1.2	0.278411
g	0.580313	1.2	0.29379
g	0.67157	1.2	0.384586
g	0.925246	1.2	0.0577175
g	0.982271	1.2	0.112944
g	0.308301	1.2	0.0728875
g	0.701806	1.2	0.404737
g	1.47229	1.2	0.520156
g	1.48388	1.2	0.604571
g	1.4858	1.2	0.6255
g	1.50543	1.2	0.7239
g	1.5277	1.2	0.736589
g	0.509491	1.2	0.915755
d	1.08001	1.7	0.290011
d	1.09528	1.7	0.255049
d	1.048	1.7	0.1725
d	0.940479	1.7	0.165
d	0.995907	1.7	0.15252
d	0.898756	1.7	0.142522
d	0.940332	1.7	0.162578
d	0.730962	1.7	0.03
d	0.623001	1.7	0.0225
d	0.743106	1.7	0.800035
d	0.647519	1.7	0.387507
d	0.98008	1.7	0.71254
d	1.06261	1.7	1.17757
d	1.0951	1.7	1.19257
d	1.09018	1.7	1.20763
d	1.135	1.7	1.265
d	1.20752	1.7	1.18751
d	1.36002	1.7	1.1526
d	1.4175	1.7	1.14767
d	0.46	1.7	1.055
d	0.487526	1.7	1.05761
d	0.357815	1.7	0.607546
d	0.18527	1.7	0.912504
d	0.2801	1.7	0.522596
c	0.915004	1.2	0.837802
c	0.967616	1.2	0.875014
c	0.890014	1.2	0.690222
c	1.11757	1.2	0.762701
c	1.13501	1.2	0.775101
c	1.22516	1.2	0.70254
c	1.21501	1.2	0.715004
c	1.26502	1.2	0.647577
c	1.24766	1.2	0.635044
c	1.26766	1.2	0.605419
c	0.95814	1.2	0.585341
c	0.846787	1.2	0.502724
c	0.933254	1.2	0.442564
c	0.950329	1.2	0.405192
c	0.895004	1.2	0.370211
c	0.916505	1.2	0.365138
c	0.992512	1.2	0.395071
c	0.660384	1.2	0.33001
c	0.80306	1.2	0.255
c	1.04265	1.2	0.182569
c	1.23307	1.2	0.262512
c	1.32875	1.2	0.365
c	1.38788	1.2	0.377532
c	1.46305	1.2	0.483024
c	1.49255	1.2	0.477664
c	1.63023	1.2	0.613117
c	1.41287	1.2	0.68
c	0.840238	1.2	1.21254
c	0.772827	1.6	1.21004
c	0.32251	1.6	0.942619
c	0.3025	1.6	0.900281
c	0.71528	1.6	1.12028
c	0.850235	1.6	1.22771
c	0.883194	1.6	1.02253
c	0.902625	1.6	1.03751
c	0.960732	1.6	1.11254
c	0.977759	1.6	1.11018
c	0.985621	1.6	1.11322
c	1.00038	1.6	1.15033
c	1.07557	1.6	1.04769
c	1.19754	1.6	1.14789
c	1.24822	1.6	1.1725
c	1.49007	1.6	1.20776
c	1.51013	1.6	1.22565
c	1.51021	1.6	1.10791
c	1.57257	1.6	1.09548
c	1.46751	1.6	0.977529
c	1.31774	1.6	0.945846
c	1.60024	1.6	0.772989
c	1.61005	1.6	0.75015
c	1.59813	1.6	0.602686
c	1.39	1.6	0.515151
c	1.34817	1.6	0.445112
c	1.12268	1.6	0.425
c	1.01329	1.6	0.365
c	1.10007	1.6	0.372509
c	1.19754	1.6	0.3
c	1.07255	1.6	0.237514
c	0.655	1.6	0.227555
c	0.490006	1.6	0.092635
c	0.642739	1.6	0.0825
c	0.692662	1.6	0.0975
c	0.585	1.6	0.0225
b	0.7725	2.2	2.75397
b	0.36	2.2	1.68007
b	0.510496	2.2	1.92803
b	0.787536	2.2	2.31897
b	1.44008	2.2	2.55751
b	1.41782	2.2	2.47505
b	1.39532	2.2	2.47518
b	1.44781	2.2	2.6325
b	1.46258	2.2	2.68501
b	1.65752	2.2	2.69251
b	1.38752	2.2	2.92524
b	2.22761	2.2	2.83549
b	2.22046	2.2	2.80516
b	2.53571	2.2	2.94061
b	2.6101	2.2	3.02258
b	2.32519	2.2	2.4976
b	2.28829	2.2	2.42292
b	1.85264	2.2	2.15271
b	1.86774	2.2	2.00285
b	1.96501	2.2	1.70276
b	2.51278	2.2	1.215
b	2.58751	2.2	1.29752
b	3.27854	2.2	1.20771
b	3.63077	2.2	1.3125
b	2.56554	2.2	1.65015
b	3.36188	2.2	2.14631
b	4.26517	2.2	2.17605
b	4.26024	2.2	2.2052
b	4.84756	2.2	1.99523
b	4.91667	2.2	1.97251
b	4.17195	2.2	2.33309
b	4.47141	2.2	2.8964
b	1.07253	1.7	2.57277
b	1.08773	1.7	2.49028
b	1.27535	1.7	2.58751
b	1.53265	1.7	2.35597
b	1.53779	1.7	2.45268
b	1.70265	1.7	2.38511
b	0.915123	1.7	1.20759
b	1.02011	1.7	1.38002
b	0.40507	1.7	0.502724
b	0.367576	1.7	0.540052
b	0.202639	1.7	0.2625
b	0.915	1.7	1.005
b	0.165	1.7	0.165
b	1.00511	1.7	1.17752
b	1.0575	1.7	1.23002
b	1.1626	1.7	1.11091
b	1.32136	1.7	1.14789
b	1.29785	1.7	1.16289
b	1.44752	1.7	1.35758
b	1.53752	1.7	1.44758
b	1.57507	1.7	1.49267
b	1.66527	1.7	1.51546
b	1.80806	1.7	1.605
b	1.75514	1.7	1.665
b	1.7404	1.7	1.65109
b	2.22812	1.7	1.60502
b	2.31147	1.7	1.65015
b	2.38519	1.7	1.11
b	2.70001	1.7	1.17002
b	2.58027	1.7	0.885127
b	2.31761	1.7	0.787643
b	2.5876	1.7	0.285
b	2.67009	1.7	0.360077
b	2.36518	1.7	0.105
b	2.89749	1.7	0.232621
b	3.05309	1.7	0.3225
b	3.21001	1.7	0.427566
b	4.10275	1.7	1.21502
b	4.41	1.7	1.98
b	2.92062	1.7	2.91004
b	4.23067	1.7	3.17253
b	4.6203	1.7	2.59539
b	0.945268	2.2	6.10553
b	0.97526	2.2	6.13553
b	0.0675	2.2	6.323
b	0.142697	2.2	4.9357
b	0.045	2.2	4.00549
b	0.045	2.2	4.02049
b	0.175089	2.2	4.51563
b	0.157679	2.2	4.53799
b	0.997754	2.2	4.6881
b	1.33519	2.2	4.04308
b	1.38768	2.2	4.04299
b	1.34252	2.2	4.05049
b	1.86024	2.2	4.48564
b	1.83825	2.2	4.54552
b	2.26501	2.2	4.11056
b	2.82001	2.2	3.82577
b	0.653189	2.2	5.08551
b	0.690162	2.2	5.11567
b	0.367576	2.2	5.16066
b	2.71566	2.2	5.02551
b	2.70017	2.2	5.09301
b	2.95547	2.2	5.30343
b	3.07504	2.2	5.16799
b	3.34521	2.2	4.18555
b	3.74287	2.2	4.35053
b	3.69001	2.2	4.50052
b	3.593	2.2	5.06307
b	3.578	2.2	5.05568
b	2.03362	2.2	5.05551
b	0.885509	1.7	7.19499
b	0.810312	1.7	6.65522
b	0.840034	1.7	6.63264
b	0.997613	1.7	6.74513
b	1.02011	1.7	6.70058
b	0.93753	1.7	6.085
b	1.1476	1.7	7.31502
b	1.67265	1.7	7.41999
b	1.66515	1.7	7.40505
b	1.86804	1.7	7.36768
b	2.16797	1.7	7.10499
b	2.40807	1.7	7.11366
b	2.67759	1.7	6.8953
b	2.67877	1.7	6.67782
b	2.52005	1.7	6.58911
b	2.5425	1.7	6.58187
b	3.72019	1.7	6.62559
b	2.88829	1.7	5.97292
b	2.90285	1.7	5.965
b	2.61087	1.7	5.38
b	2.5575	1.7	5.48505
b	2.59553	1.7	5.44788
b	2.775	1.7	5.00501
b	0.202639	1.7	4.84751
b	0.5175	1.7	4.86251
b	0.2625	1.7	3.80517
b	0.405	1.7	3.82067
b	0.922774	1.7	3.68591
b	1.14002	1.7	3.69999
b	1.27502	1.7	3.94749
b	2.92501	1.7	3.74499
b	3.66062	1.7	3.87999
b	3.7125	1.7	3.73036
b	1.47904	1.7	5.02032
b	1.44752	1.7	5.02346

## Sheet: PFC (retro)
Injection site	DV	AP	ML
B	0.0701787	4.7	0.540052				A-P Injection location
B	0.157679	4.7	0.630124			A	-2.8
B	0.21	4.7	0.637505			B	-3.3
B	0.332537	4.7	0.745004			C	-3.8
B	0.252611	4.7	0.480006			D	-4.3
B	0.35008	4.7	0.62758			E	-4.8
B	0.29501	4.7	0.425
B	0.405007	4.7	0.632678
B	0.462561	4.7	0.642544
B	0.565022	4.7	0.645044
B	0.555022	4.7	0.7575
B	0.537592	4.7	0.752504
B	0.46	4.7	0.767601
B	0.492525	4.7	0.795035
B	0.497901	4.7	0.810004
B	0.405	4.7	0.907531
B	0.450027	4.7	0.9125
B	0.565022	4.7	1.0675
B	0.552506	4.7	0.990004
B	0.720156	4.7	1.11
B	0.642544	4.7	0.8275
B	0.705017	4.7	0.877504
B	0.825004	4.7	1.07529
B	0.665075	4.7	0.930165
B	0.890088	4.7	1.11754
B	0.645	4.7	0.625245
B	0.745016	4.7	0.585
B	1.0825	4.7	0.702611
B	1.07503	4.7	0.890004
B	0.990256	4.7	0.920122
B	1.17504	4.7	0.970725
B	0.1775	4.7	0.272546
B	0.197564	4.7	0.30751
B	0.437564	4.7	0.507654
B	0.4625	4.7	0.362509
B	0.555051	4.7	0.485057
B	0.49	4.7	0.590005
B	0.595021	4.7	0.630045
B	0.617505	4.7	0.577505
B	0.650005	4.7	0.547506
B	0.62758	4.7	0.612505
B	0.655042	4.7	0.675019
B	0.517506	4.7	0.6575
B	0.587505	4.7	0.720004
B	0.525054	4.7	0.697786
B	0.557505	4.7	0.765004
B	0.747537	4.7	0.782504
B	0.445252	4.7	0.86763
B	0.287511	4.7	0.697786
B	0.505025	4.7	0.887514
B	0.492601	4.7	0.94003
B	0.490025	4.7	1.03008
B	0.747605	4.7	1.15
B	0.897531	4.7	1.1125
B	0.857532	4.7	0.817962
B	0.440029	4.7	0.962763
B	1.00758	4.7	1.0475
B	0.94	4.7	0.045
B	1.02251	4.7	0.07754
B	1.20504	4.7	0.0725
B	1.45251	4.7	0.0975
B	1.35504	4.7	0.295
B	1.51505	4.7	0.435
B	1.06779	4.7	0.81
B	1.34296	4.7	1.07751
B	0.835034	4.7	0.600021
B	0.860015	4.7	0.867504
B	1.4926	4.7	1.12
B	0.0850362	4.7	1.7026
B	0.1625	4.7	1.59262
B	0.225	4.7	1.57258
B	0.230014	4.7	1.60507
B	0.315	4.7	1.28754
B	0.2575	4.7	1.38254
B	0.345036	4.7	1.35013
B	0.467526	4.7	1.35754
B	0.575005	4.7	1.28521
B	0.657505	4.7	1.26004
B	0.572549	4.7	1.39006
B	0.510097	4.7	1.49755
B	0.512555	4.7	1.51271
B	0.540052	4.7	1.58767
B	0.602505	4.7	1.64505
B	0.502724	4.7	1.74019
B	0.202515	4.7	1.89506
B	0.480026	4.7	1.89011
B	0.5725	4.7	1.55505
B	0.572505	4.7	1.72014
B	0.65	4.7	1.85504
B	0.6075	4.7	1.93015
B	0.6775	4.7	2.02758
B	0.70266	4.7	2.08255
B	0.5025	4.7	2.23509
B	0.472506	4.7	2.27004
B	0.537506	4.7	2.29007
B	0.532524	4.7	2.36005
B	0.890014	4.7	1.63505
B	1.37254	4.7	1.78518
B	1.545	4.7	1.99764
B	0.777564	4.7	1.94254
B	0.33251	4.7	2.15004
B	0.400007	4.7	2.15507
B	0.580021	4.7	2.41261
B	0.5725	4.7	2.29755
B	0.7025	4.7	2.44005
B	0.435065	4.7	2.13004
B	0.740105	4.7	1.83255
B	0.0650475	4.5	0.162519
B	0.0275	4.5	0.257549
B	0.0425737	4.5	0.28
B	0.407507	4.5	0.635079
B	0.225055	4.5	0.308322
B	0.210015	4.5	0.195144
B	0.145	4.5	0.105119
B	0.175	4.5	0.05
B	0.407569	4.5	0.337537
B	0.377575	4.5	0.297878
B	0.507525	4.5	1.0901
B	0.555006	4.5	1.1425
B	0.255012	4.5	0.787516
B	0.287511	4.5	0.730069
B	0.265	4.5	0.93762
B	0.57	4.5	1.135
B	0.927504	4.5	1.19759
B	0.1625	4.5	0.202515
B	0.445	4.5	0.185018
B	0.522506	4.5	0.642578
B	0.695005	4.5	0.802597
B	0.982504	4.5	0.940014
B	1.06503	4.5	1.15254
B	1.18754	4.5	1.1325
B	1.28012	4.5	0.685041
B	0.832635	4.5	0.662505
B	0.640044	4.5	0.987703
B	0.987614	4.5	1.10514
B	0.41753	4.5	0.47
B	0.5	4.5	1.06257
B	0.8225	4.5	0.720004
B	1.52503	4.5	1.0675
A	0.150084	5	0.912531
A	0.162672	5	0.8475
A	0.170165	5	0.757604
A	0.20014	5	0.330037
A	0.207515	5	0.1075
A	0.305092	5	1.2352
A	0.552506	5	0.135024
A	0.857591	5	0.16
A	0.140022	5	1.07503
A	0.41503	5	1.25505
A	0.775004	5	1.47256
A	0.907504	5	0.6475
A	1.42261	5	1.19509
A	1.53753	5	0.982649
A	1.4803	5	1.15252
A	0.3625	5	1.75507
A	0.840034	5	1.84526
A	1.52025	5	1.86754
A	0.557505	5	0.7375
A	0.652519	5	0.870225
A	1.73774	5	0.710023
A	1.77023	5	0.730005
A	1.76501	5	0.680024
A	1.73514	5	0.627506
A	1.86506	5	0.785005
A	0.1825	4.7	0.522506
A	0.35	4.7	0.667505
A	0.702611	4.7	0.667618
A	1.3025	4.7	1.00503
A	1.4475	4.7	1.04757
A	1.04255	4.7	0.912624
A	1.18752	4.7	0.700017
A	1.35501	4.7	0.7425
D	0.24	4.2	0.662575
D	0.290011	4.2	1.08751
D	0.272511	4.2	1.14751
D	1.26002	4.2	0.063295
D	1.095	4.2	0.537645
D	1.02508	4.2	0.567522
D	1.24751	4.2	0.976412
D	0.985	4.2	1.0625
D	1.08	4.2	1.08773
D	1.2525	4.2	1.22308
D	1.44503	4.2	0.41753
D	1.62759	4.2	0.595084
D	1.45752	4.2	0.772504
D	1.3925	4.2	0.892587
D	1.47253	4.2	0.9625
D	1.50255	4.2	0.955004
D	1.44764	4.2	0.542522
D	1.53003	4.2	0.407507
D	1.26252	4.2	1.08503
D	1.27512	4.2	0.49
D	1.45014	4.2	0.390032
D	0.242512	4	0.690041
D	0.232514	4	0.230014
D	0.645121	4	0.327652
D	0.4175	4	0.210015
D	0.482604	4	0.440177
D	0.73	4	0.2675
D	0.467608	4	0.295
D	0.815004	4	0.455006
D	0.870014	4	0.410069
D	0.1025	4	0.402507
D	0.070045	4	0.4675
D	0.09	4	0.450027
D	0.0403112	4	0.155
D	0.410374	4	0.15752
D	0.683274	4	0.21006
D	0.2025	4	0.785036
D	0.23	4	0.820034
D	0.490006	4	0.632545
D	0.530006	4	0.05025
D	0.540006	4	0.0225
D	0.517506	4	0.242512
D	0.527554	4	0.290097
D	0.587505	4	0.365138
D	0.405007	4	0.395071
D	0.282511	4	0.545006
D	1.02752	4	1.43502
D	1.25007	4	1.46752
D	1.61265	4	1.50008
D	2.3225	4	1.52272
D	0.9225	4	1.77758
D	1.1825	4	1.87253
D	1.325	4	1.84001
D	1.23501	4	1.85758
D	1.72503	4	1.88511
D	2.03	4	2.00001
D	2.19269	4	1.91029
D	2.26002	4	1.84265
D	2.23004	4	2.01517
D	1.44002	4	1.62254
D	1.50002	4	2.09259
D	1.52002	4	2.055
D	0.517554	3.7	0.735
D	0.2775	3.7	0.332585
D	0.332537	3.7	0.025125
D	0.597505	3.7	0.1425
D	0.735106	3.7	0.593028
D	0.910031	3.7	0.733016
D	1.06753	3.7	0.7875
D	0.305164	3.7	0.792535
D	1.16782	3.7	0.452562
D	1.22504	3.7	0.382532
D	1.33803	3.7	0.352641
D	1.18751	3.7	0.730017
C	0.53	3.7	0.585048
C	0.537592	3.7	0.480026
C	0.567522	3.7	0.3675
C	0.602754	3.7	0.472506
C	0.852504	3.7	0.530052
C	0.98008	3.7	0.30751
C	0.995112	3.7	0.380205
C	1.05501	3.7	0.565271
C	1.38258	3.7	0.445
E	1.31069	4.2	1.21751
E	1.23316	4.2	0.925054
E	1.30281	4.2	0.765036
E	1.495	4.2	0.195016
E	1.625	4.2	0.997579
E	1.76251	4.2	1.09005
E	1.53501	4.2	0.380074
E	1.78278	4.2	0.700111
E	1.98771	3.7	0.190263
E	1.86603	3.7	0.401319
E	1.90682	3.7	0.384586
E	1.60674	3.7	0.42712
E	1.64931	3.7	0.421456
E	1.24564	3.7	0.429607
E	1.49845	3.7	0.302655
E	1.80874	3.7	0.127891
E	1.17822	3.7	0.440596
E	1.62061	3.7	0.375408
E	1.05036	3.7	0.281536
E	1.17817	3.7	0.307296
E	0.909582	3.7	0.270116
E	0.854076	3.7	0.272259
E	1.3951	3.7	0.240052
E	1.44144	3.7	0.257609
E	1.59548	3.7	0.122907
E	1.04507	3.7	0.442612
E	0.982539	3.7	0.340036
E	1.76755	3.7	0.330037
E	1.53753	3.7	0.192516

## Sheet: PFC (antero)
Injection site	DV	AP	ML
C	0.956279	4.2	0.326272
C	0.984375	4.2	0.380667
C	0.984377	4.2	0.301898
C	1.01628	4.2	0.328173
C	0.298125	4.2	0.450016
C	0.311256	4.2	0.48375
C	0.313147	4.2	0.463125
C	0.304033	4.2	0.46875
C	0.774411	4.2	0.551636
C	0.249438	4.2	0.517503
C	0.04125	4.2	0.211875
C	0.735344	4.2	0.669377
C	0.489432	4.2	0.294471
C	1.31631	4.2	0.35813
C	1.35949	4.2	0.358145
C	1.34063	4.2	0.397611
C	1.34449	4.2	0.350705
C	1.26192	4.2	0.114437
C	1.26388	4.2	0.0993928
C	1.2451	4.2	0.103125
C	1.27317	4.2	0.103125
C	1.16814	4.2	0.303802
C	1.40452	4.2	0.36
C	1.43443	4.2	0.35625
C	1.33316	4.2	0.577527
C	1.36711	4.2	0.5625
C	1.40077	4.2	0.585108
C	1.43267	4.2	0.620636
C	1.4553	4.2	0.135
C	1.41761	4.2	0.675042
C	1.4232	4.2	0.688125
C	1.38574	4.2	0.513805
C	1.42877	4.2	0.573998
C	1.49825	4.2	0.631919
C	1.51507	4.2	0.184094
C	1.0107	4.2	0.511999
C	1.08938	4.2	0.4575
C	1.38008	4.2	0.695625
C	1.39327	4.2	0.70126
C	1.42318	4.2	0.667511
C	1.5113	4.2	0.358145
C	1.54144	4.2	0.195
C	1.54902	4.2	0.25125
C	1.51501	4.2	0.427504
C	1.36533	4.2	0.438754
C	1.46454	4.2	0.481875
C	1.53007	4.2	0.504389
C	1.61646	4.2	0.500713
C	1.62569	4.2	0.536411
C	1.55644	4.2	0.390004
C	1.52063	4.2	0.609378
C	1.53192	4.2	0.5775
C	1.32938	4.2	0.519378
C	1.23198	4.2	0.288902
C	1.33509	4.2	0.588798
C	1.42125	4.2	0.676968
C	1.49438	4.2	0.710635
C	1.51692	4.2	0.693773
C	1.32949	4.2	0.568137
C	1.40251	4.2	0.594422
C	1.49649	4.2	0.690023
C	1.14001	4.2	0.418192
C	1.09138	4.2	0.0732209
C	1.09884	4.2	0.166917
C	0.662009	3.7	0.253153
C	0.864375	3.7	0.395629
C	0.892506	3.7	0.414375
C	1.14375	3.7	0.320647
C	1.62199	3.7	0.410625
C	1.49654	3.7	0.650668
C	1.44201	3.7	0.755709
C	1.34438	3.7	0.080625
C	0.64125	3.7	0.118125
C	1.67438	3.7	0.223133
D	0.075	4.4	0.305631
D	0.0600294	4.4	0.249403
D	0.07875	4.4	0.286881
D	0.08625	4.4	0.318772
D	0.165096	4.4	0.391875
D	0.556926	4.4	0.851268
D	0.410663	4.4	0.759488
D	0.391879	4.4	0.731272
D	0.301928	4.4	0.635761
D	0.253132	4.4	0.590985
D	0.266257	4.4	0.620625
D	0.249382	4.4	0.560675
D	0.234405	4.4	0.532553
D	0.253153	4.4	0.532582
D	0.249438	4.4	0.560826
D	0.195	4.4	0.429477
D	0.22125	4.4	0.470685
D	0.204384	4.4	0.478492
D	0.195081	4.4	0.461254
D	0.206258	4.4	0.44816
D	0.206667	4.4	0.481933
D	0.108895	4.4	0.315022
D	0.09	4.4	0.225008
D	0.0619034	4.4	0.206463
D	0.0675259	4.4	0.133178
D	0.05625	4.4	0.080625
D	0.103125	4.4	0.125625
D	0.118125	4.4	0.103193
D	0.024375	4.4	0.0375
D	0.110625	4.4	0.0918941
D	0.225632	4.4	0.193125
D	0.14625	4.4	0.174385
D	0.296303	4.4	0.3075
D	0.360005	4.4	0.305769
D	0.36188	4.4	0.303842
D	0.35438	4.4	0.336049
D	0.448317	4.4	0.319196
D	0.483808	4.4	0.0675
D	0.511889	4.4	0.0750234
D	0.495032	4.4	0.065625
D	0.496878	4.4	0.073125
D	0.526888	4.4	0.0526337
D	0.538154	4.4	0.0487859
D	0.560628	4.4	0.0733409
D	0.616901	4.4	0.110625
D	0.5832	4.4	0.129497
D	0.609401	4.4	0.088125
D	0.620651	4.4	0.080625
D	0.64125	4.4	0.0525334
D	0.70125	4.4	0.12
D	0.806328	4.4	0.105
D	0.873913	4.4	0.116265
D	0.886875	4.4	0.15375
D	0.935717	4.4	0.133138
D	0.963752	4.4	0.0820084
D	0.986599	4.4	0.127555
D	0.783831	4.4	0.245689
D	0.699626	4.4	0.271875
D	0.611483	4.4	0.296274
D	0.559131	4.4	0.350645
D	0.654643	4.4	0.361875
D	0.757614	4.4	0.367519
D	0.785634	4.4	0.401605
D	0.688166	4.4	0.442516
D	0.759375	4.4	0.457562
D	0.810035	4.4	0.466935
D	0.759384	4.4	0.49125
D	0.594482	4.4	0.530678
D	0.530787	4.4	0.5325
D	0.511961	4.4	0.575625
D	0.634027	4.4	0.615183
D	0.789518	4.4	0.5832
D	0.982588	4.4	0.43875
D	1.02753	4.4	0.189384
D	1.07063	4.4	0.22737
D	1.12888	4.4	0.206258
D	0.949646	4.4	0.181914
D	0.991962	4.4	0.382541
D	1.05997	4.4	0.414528
D	1.02006	4.4	0.373144
D	0.997528	4.4	0.39375
D	1.12888	4.4	0.54949
D	1.16252	4.4	0.493139
D	1.03129	4.4	0.540029
D	1.22625	4.4	0.909377
D	1.23194	4.4	0.87375
D	1.19815	4.4	0.913281
D	1.24875	4.4	0.894377
D	0.901883	4.4	0.778206
D	0.90586	4.4	0.748409
D	0.903752	4.4	0.787536
D	0.909702	4.4	0.662045
D	0.825136	4.4	0.646973
D	0.79508	4.4	0.652543
D	1.15887	4.4	0.564387
D	0.765147	4.4	0.12
D	0.286875	4.4	0.781895
D	1.39879	4.4	0.16876
D	1.44943	4.4	0.176499
D	1.41577	4.4	0.210008
D	1.41194	4.4	0.17625
D	2.06061	4.4	0.474675
D	2.05645	4.4	0.460063
D	2.06978	4.4	0.444252
D	2.07617	4.4	0.455656
D	1.3407	4.4	0.35075
D	1.59269	4.4	0.382468
D	1.4764	4.4	0.24634
D	1.41863	4.4	0.559344
D	1.50074	4.4	0.203746
D	1.28813	4.4	0.0637775
D	1.35002	4.4	0.069375
D	1.29188	4.4	0.0900781
D	1.30552	4.4	0.045
D	0.2025	4.2	0.592503
D	0.260733	4.2	0.616875
D	0.273757	4.2	0.62442
D	0.35438	4.2	0.681206
D	0.421892	4.2	0.680627
D	0.185634	4.2	0.508128
D	0.230625	4.2	0.427517
D	0.196955	4.2	0.215755
D	0.24375	4.2	0.247564
D	0.270104	4.2	0.219375
D	0.414481	4.2	0.324375
D	0.45191	4.2	0.468844
D	0.397504	4.2	0.457688
D	0.36938	4.2	0.435004
D	0.375019	4.2	0.427566
D	0.371255	4.2	0.405039
D	0.551365	4.2	0.534427
D	0.632011	4.2	0.52875
D	0.688148	4.2	0.56625
D	0.718127	4.2	0.583233
D	0.813785	4.2	0.52503
D	0.834546	4.2	0.541878
D	0.845658	4.2	0.588753
D	0.885	4.2	0.583125
D	0.898283	4.2	0.579378
D	0.952517	4.2	0.6244
D	1.04096	4.2	0.6319
D	1.11013	4.2	0.603892
D	1.14405	4.2	0.541878
D	1.15882	4.2	0.566327
D	1.18934	4.2	0.51375
D	1.19064	4.2	0.581298
D	1.13075	4.2	0.693955
D	1.17193	4.2	0.746401
D	0.571986	4.2	0.759562
D	0.866414	4.2	0.585003
D	0.939382	4.2	0.39
D	0.009375	4.2	0.213783
D	0.043125	4.2	0.287028
D	0.039375	4.2	0.450472
E	0.298148	4.6	0.185625
E	0.330021	4.6	0.273757
E	0.341271	4.6	0.238154
E	0.31125	4.6	0.189375
E	0.136875	4.6	0.292524
E	0.305625	4.6	0.437277
E	0.367505	4.6	0.62632
E	0.305717	4.6	0.725821
E	0.324397	4.6	0.761308
E	0.33188	4.6	0.765
E	0.305648	4.6	0.789411
E	0.32451	4.6	0.823178
E	0.084375	4.6	0.684467
E	0.07875	4.6	0.592548
E	0.0151169	4.6	0.446285
E	0.0338022	4.6	0.463129
E	0.073125	4.6	0.692129
E	0.0826916	4.6	0.691898
E	0.12	4.6	0.697591
E	0.144424	4.6	0.705022
E	0.138763	4.6	0.70126
E	0.136888	4.6	0.678792
E	0.307523	4.6	0.905625
E	0.513781	4.6	0.540081
E	0.695648	4.6	0.787937
E	0.676875	4.6	0.06375
E	0.686252	4.6	0.0637775
E	0.688127	4.6	0.06375
E	0.673135	4.6	0.0487859
E	0.931922	4.6	0.378824
E	0.958127	4.6	0.375005
E	0.978766	4.6	0.399415
E	0.935642	4.6	0.425691
E	0.542034	4.6	0.17629
E	0.911252	4.6	0.065625
E	0.91125	4.6	0.0469125
E	0.82875	4.6	0.915008
E	0.849377	4.6	0.924375
E	0.866258	4.6	0.918757
E	0.851258	4.6	0.898195
E	0.81375	4.6	0.868224
E	0.969377	4.6	0.840605
E	1.01077	4.6	0.871883
E	1.12501	4.6	0.943155
E	1.16066	4.6	0.75
E	0.543908	4.6	0.870099
E	0.29625	4.6	0.684377
E	0.12	4.6	0.412653
E	0.301881	4.6	0.80627
E	0.382518	4.6	0.795055
E	0.485683	4.6	0.918905
E	0.52503	4.6	0.922502
E	0.941267	4.6	0.772521
E	0.470759	4.6	0.879473
E	0.489407	4.6	0.9
E	0.33	4.6	0.8775
E	0.35258	4.6	0.892697
E	0.176251	5.2	0.0968831
E	0.1775	5.2	0.116257
E	0.184385	5.2	0.1
E	0.183754	5.2	0.08875
E	0.228751	5.2	0.125627
E	0.236878	5.2	0.11814
E	0.235625	5.2	0.229376
E	0.133131	5.2	0.250625
E	0.0219106	5.2	0.215698
E	0.013125	5.2	0.142522
E	0.0787722	5.2	0.083125
E	0.0406297	5.2	0.033125
E	0.113778	5.2	0.311272
E	0.556887	4.7	0.110625
E	0.603776	4.7	0.0658656
E	0.626295	4.7	0.110688
E	0.588753	4.7	0.123764
E	0.375	4.7	0.390113
E	0.388125	4.7	0.405004
E	0.431254	4.7	0.436891
E	0.543763	4.7	0.459436
E	0.551279	4.7	0.423767
E	0.528803	4.7	0.521304
E	0.603753	4.7	0.560938
E	0.429379	4.7	0.626295
E	0.470659	4.7	0.66
E	0.348755	4.7	0.663774
E	0.296256	4.7	0.718213
E	0.286881	4.7	0.79502
E	0.315201	4.7	0.821423
E	0.12	4.7	0.461284
E	0.118125	4.7	0.16697
E	0.084375	4.7	0.1275
E	0.33375	4.7	0.669469
E	0.495003	4.7	0.380643
E	0.161424	4.7	0.386268
E	0.343125	4.7	0.661941
E	0.391915	4.7	0.412504
E	0.575637	4.7	0.135
B	0.568153	4.7	0.808134
B	0.573762	4.7	0.811875
B	0.581253	4.7	0.815659
B	0.598128	4.7	0.825002
B	0.337547	4.7	0.566253
B	0.296256	4.7	0.543831
B	0.382872	4.7	0.620854
B	0.341296	4.7	0.579621
B	0.313147	4.7	0.549426
B	0.260632	4.7	0.620625
B	0.020625	4.7	0.0918941
B	0.03375	4.7	0.12
B	0.043125	4.7	0.176499
B	0.02625	4.7	0.0976622
B	0.388143	4.7	0.819383
B	0.39379	4.7	0.841875
B	0.418142	4.7	0.832508
B	0.345082	4.7	0.568125
B	0.195036	4.7	0.300287
B	0.240007	4.7	0.181962
B	0.418142	4.7	0.828769
B	0.91125	4.7	0.611813
B	0.984553	4.7	0.635694
B	1.06879	4.7	0.646875
B	1.03329	4.7	0.571887
B	0.725629	4.7	1.45972
B	0.74625	4.7	1.44856
B	0.74441	4.7	1.48595
B	0.770658	4.7	1.47094
B	0.8325	4.7	1.59486
B	0.840029	4.7	1.57219
B	0.875625	4.7	1.59469
B	0.851279	4.7	1.61907
B	0.722024	4.7	1.6436
B	0.77064	4.7	1.62495
B	0.440674	4.7	1.33793
B	0.466969	4.7	1.32476
B	0.395625	4.7	1.37725
B	0.41439	4.7	1.40912
B	0.465	4.7	1.52161
B	0.568132	4.7	1.51792
B	0.566276	4.7	1.14314
B	0.626272	4.7	1.1297
B	0.570007	4.7	1.11285
B	0.64688	4.7	1.10536
B	0.52507	4.7	1.71656
B	0.617228	4.7	1.6586
B	0.813753	4.7	1.7822
B	0.604216	4.7	1.70156
B	0.664057	4.7	1.7147
B	0.617013	4.7	1.7035
B	0.633938	4.7	1.72037
B	0.692161	4.7	1.67165
B	0.661894	4.7	1.66603
B	0.639504	4.7	1.65293
B	0.69757	4.7	1.76745
B	0.688129	4.7	1.74108
B	0.641255	4.7	1.7522
B	0.697517	4.7	1.8407
B	0.710693	4.7	1.85158
B	0.806374	4.7	1.78254
B	1.02004	4.7	1.14656
B	1.44757	4.7	1.54782
B	1.50939	4.7	1.54407
B	1.52625	4.7	1.54796
B	1.52065	4.7	1.55545
B	1.45155	4.7	1.56661
B	1.32194	4.7	1.79722
B	1.53212	4.7	1.81061
B	1.46816	4.7	1.76205
B	1.48512	4.7	1.87409
B	1.39128	4.7	1.37719
B	1.39126	4.7	1.4147
B	1.49438	4.2	0.275651
B	1.56569	4.2	0.238125
B	1.66128	4.2	0.243757
B	1.59381	4.2	0.32438
B	1.23002	4.2	0.223133
B	0.97129	4.2	0.247677
B	0.93	4.2	0.226875
B	0.928204	4.2	0.206327
B	0.999379	4.2	0.356373
B	0.755625	4.2	0.472515
B	0.744375	4.2	0.470625
B	0.798781	4.2	0.465061
B	0.780136	4.2	0.442504
B	0.785633	4.2	0.480004
B	0.841875	4.2	0.78011
B	0.900022	4.2	0.851382
B	0.956291	4.2	0.825034
B	0.911255	4.2	0.706877
B	1.21694	4.2	0.420004
B	0.656271	4.2	0.129388
B	0.933794	4.2	0.223251
B	0.982517	4.2	0.129388
B	1.30504	4.2	0.226875
B	1.04076	4.2	0.667566
B	1.46841	4.2	1.14944
B	0.622536	4.2	1.57877
B	0.6225	4.2	1.59567
B	0.639402	4.2	0.91125
B	1.66371	4.2	1.31872
B	0.95063	4.2	1.01638
B	1.49825	4.2	0.962018
B	1.57875	4.2	0.9675
B	1.54318	4.2	1.01064
B	1.53616	4.2	0.901875
B	1.50563	4.2	0.980721
B	1.21704	4.2	0.609375
B	1.44568	4.2	1.26188
B	0.418347	4.2	1.2975
B	0.38625	4.2	1.30715
B	0.358733	4.2	1.31065
B	0.483763	4.2	1.2825
B	0.69567	4.2	1.22645
B	0.46314	4.2	1.19651
B	0.660006	4.2	1.08949
B	0.738822	4.2	1.07824
B	0.7689	4.2	1.03192
B	0.765823	4.2	0.928233
B	0.688748	4.2	0.89063
B	0.444375	4.2	1.16813
B	0.84591	4.2	0.991968
B	0.489572	4.2	1.05953
